# Supplementary material for: Encoding matter with regiospecific 12C/13C isotopic labels
Source: Royal Society of Chemistry journal article supplement (doi:10.1039/c8cc00080h), 2018-01-01

Supporting information

## Encoding Matter with Regiospecific $^{12}\text{C}/^{13}\text{C}$ Isotopic Labels

James J. La Clair<sup>[a],\*</sup>

<sup>[a]</sup> Xenobe Research Institute, P. O. Box 3052, San Diego, CA 92163-1062, United States

\*Correspondence and request for materials should be directed via email to  
James J. La Clair (i@xenobe.org)

| <b>Contents:</b>                                                                               | <b>Page</b> |
|------------------------------------------------------------------------------------------------|-------------|
| <b>A.</b> General synthetic methods.                                                           | S3          |
| <b>B.</b> Synthesis of $^{12}\text{C}$ -4'-methylapigenenin ( <b>0</b> ).                      | S3          |
| <b>C.</b> Synthesis of $^{13}\text{C}$ -4'-methylapigenenin ( <b>1</b> ).                      | S3          |
| <b>D.</b> Synthesis of $^{12}\text{C}$ -4', $^{12}\text{C}$ -7-methylapigenenin ( <b>00</b> ). | S3          |
| <b>E.</b> Synthesis of $^{12}\text{C}$ -4', $^{13}\text{C}$ -7-methylapigenenin ( <b>01</b> ). | S4          |
| <b>F.</b> Synthesis of $^{13}\text{C}$ -4', $^{12}\text{C}$ -7-methylapigenenin ( <b>10</b> ). | S4          |
| <b>G.</b> Synthesis of $^{13}\text{C}$ -4', $^{13}\text{C}$ -7-methylapigenenin ( <b>11</b> ). | S4          |
| <b>H.</b> Mixture preparation analysis.                                                        | S4          |
| Selected NMR Spectra                                                                           | S5-S18      |

**A. General synthetic methods.** Chemical reagents were purchased from Cambridge Isotope Laboratories, Sigma-Aldrich, VWR or Fischer Scientific. Anhydrous *N,N*-dimethylformamide was obtained by passage over activated molecular sieves and a subsequent NaOCN column to remove traces of dimethylamine. All reactions were performed under positive pressure of Ar in oven-dried glassware sealed with septa, with stirring from a Teflon coated stir bars using an IKAMAG RCT-basic mechanical stirrer (IKA GmbH). Analytical Thin Layer Chromatography (TLC) was performed on Silica Gel 60 F254 precoated glass plates (EM Sciences). Visualization was achieved with UV light and/or ceric ammonium molybdate (CAM) staining. Flash chromatography was carried out Geduran Silica Gel 60 (40-63 mesh) from EM Biosciences. Yields and characterization data correspond to isolated, chromatographically and spectroscopically homogeneous materials. NMR spectra were recorded on a Varian VX500 spectrometer equipped with an Xsens Cold probe Varian VS500. Chemical shifts for NMR analyses were referenced using signals from the residual solvent (acetone- $d_6$ ) with  $^1\text{H}$  and  $^{13}\text{C}$  spectra at 2.050 and 29.084 ppm, respectively. Chemical shift  $\delta$  values for  $^1\text{H}$  and  $^{13}\text{C}$  spectra are reported in parts per million (ppm) relative to these referenced values, and multiplicities are abbreviated as s = singlet, d = doublet, t = triplet, q = quartet, m = multiplet, br = broad. All  $^{13}\text{C}$  NMR spectra were recorded with complete proton decoupling. FID files were processed using MestraNova 11.0 (MestreLab Research). Electrospray (ESI) mass spectrometric analyses were performed using a ThermoFinnigan LCQ Deca spectrometer, and high-resolution analyses were conducted using a ThermoFinnigan MAT900XL mass spectrometer with electron impact (EI) ionization. A Thermo Scientific LTQ Orbitrap XL mass spectrometer was used for high-resolution electrospray ionization mass spectrometry analysis (HR-ESI-MS).

**B. Synthesis of  $^{12}\text{C}$ -4'-methylapigenenin (0).** Apigenin (24.2 mg, 0.090 mmol) was dissolved in dry DMF (0.5 mL). Solid  $\text{K}_2\text{CO}_3$  (27.2 mg, 0.197 mmol) followed by  $^{12}\text{C}$ -methyl iodide (6.7  $\mu\text{L}$ , 0.107 mmol). After 18h at rt, EtOH (1 mL) was added and the mixture was dried by airflow. The residue was purified by flash chromatography (hexanes to 1:1 hexanes/EtOAc) to afford 20.1 mg of **0** (79%), as a colorless solid. Spectroscopic properties matched that of natural samples of acacetin.

$^{12}\text{C}$ -4'-methylapigenenin (**0**):  $^1\text{H}$ -NMR (500 MHz, acetone- $d_6$ )  $\delta$  13.00 (s, 1H), 8.03 (d,  $J$  = 9.0 Hz, 1H), 7.13 (d,  $J$  = 8.9 Hz, 1H), 6.69 (d,  $J$  = 1.1 Hz, 1H), 6.56 (t,  $J$  = 1.7 Hz, 1H), 6.26 (dd,  $J$  = 0.9, 2.1 Hz, 1H), 3.92 (s, 3H); HR-ESI-MS  $m/z$  calcd.  $\text{C}_{16}\text{H}_{13}\text{O}_5$   $[\text{M}+\text{H}]^+$ : 285.0763, found 285.0761.

**C. Synthesis of  $^{13}\text{C}$ -4'-methylapigenenin (1).** Apigenin (25.8 mg, 0.095 mmol) was dissolved in dry DMF (0.5 mL). Solid  $\text{K}_2\text{CO}_3$  (29.0 mg, 0.210 mmol) followed by  $^{13}\text{C}$ -methyl iodide (7.2  $\mu\text{L}$ , 0.115 mmol). After 18h at rt, EtOH (1 mL) was added and the mixture was dried by airflow. The residue was purified by flash chromatography (hexanes to 1:1 hexanes/EtOAc) to afford 21.4 mg of **1** (79%), as a colorless solid. Spectroscopic properties matched that of natural samples of acacetin with the exception of  $^{13}\text{C}$  labeling at the methoxy-group.

$^{13}\text{C}$ -4'-methylapigenenin (**1**):  $^1\text{H}$ -NMR (500 MHz, acetone- $d_6$ )  $\delta$  13.00 (s, 1H), 8.03 (d,  $J$  = 9.0 Hz, 1H), 7.13 (d,  $J$  = 8.9 Hz, 1H), 6.69 (d,  $J$  = 1.1 Hz, 1H), 6.56 (t,  $J$  = 1.7 Hz, 1H), 6.26 (dd,  $J$  = 0.9, 2.1 Hz, 1H), 3.93 (d,  $J$  = 145.4 Hz, 3H); HR-ESI-MS  $m/z$  calcd.  $\text{C}_{15}^{13}\text{C}_1\text{H}_{13}\text{O}_5$   $[\text{M}+\text{H}]^+$ : 286.0796, found 286.0794.

**D. Synthesis of  $^{12}\text{C}$ -4', $^{12}\text{C}$ -7-methylapigenenin (00).**  $^{12}\text{C}$ -4'-methylapigenenin (25.2 mg, 0.089 mmol) dissolved in dry DMF (0.5 mL). Solid  $\text{K}_2\text{CO}_3$  (39.2 mg, 0.284 mmol) followed by  $^{12}\text{C}$ -methyl iodide (12.1  $\mu\text{L}$ , 0.195 mmol). After 18h at rt, EtOH (1 mL) was added and the mixture

was dried by airflow. The residue was purified by flash chromatography (hexanes to 1:1 hexanes/EtOAc) to afford 19.2 mg of **00** (73%), as a colorless solid.

<sup>12</sup>C-4', <sup>12</sup>C-7-methylapigenenin (**00**): <sup>1</sup>H-NMR (500 MHz, acetone-*d*<sub>6</sub>) δ 12.96 (s, 1H), 8.05 (d, *J* = 9.0 Hz, 1H), 7.14 (d, *J* = 9.0 Hz, 1H), 6.73 (s, 1H), 6.71 (d, *J* = 2.3 Hz, 1H), 6.34 (d, *J* = 2.2 Hz, 1H), 3.93 (s, 3H), 3.92 (s, 3H); δ: 183.1, 166.6, 165.0, 163.8, 163.0, 158.7, 129.0, 124.2, 115.4, 106.0, 104.6, 98.7, 93.2, 56.4, 56.0; HR-ESI-MS *m/z* calcd. C<sub>17</sub>H<sub>15</sub>O<sub>5</sub> [M+H]<sup>+</sup>: 299.0914, found 299.0912.

**E. Synthesis of <sup>12</sup>C-4', <sup>13</sup>C-7-methylapigenenin (01).** <sup>12</sup>C-4'-methylapigenenin (10.4 mg, 0.037 mmol) dissolved in dry DMF (0.5 mL). Solid K<sub>2</sub>CO<sub>3</sub> (16.2 mg, 0.117 mmol) followed by <sup>13</sup>C-methyl iodide (5.0 μL, 0.080 mmol). After 18h at rt, EtOH (1 mL) was added and the mixture was dried by airflow. The residue was purified by flash chromatography (hexanes to 1:1 hexanes/EtOAc) to afford 8.1 mg of **01** (74%), as a colorless solid.

<sup>12</sup>C-4', <sup>13</sup>C-7-methylapigenenin (**01**): <sup>1</sup>H-NMR (500 MHz, acetone-*d*<sub>6</sub>) δ 12.96 (s, 1H), 8.05 (d, *J* = 9.1 Hz, 1H), 7.14 (d, *J* = 9.1 Hz, 1H), 6.73 (s, 1H), 6.71 (d, *J* = 2.2 Hz, 1H), 6.33 (d, *J* = 2.3 Hz, 1H), 3.93 (d, *J* = 145.4 Hz, 3H), 3.92 (s, 3H); <sup>13</sup>C-NMR (125 MHz, acetone-*d*<sub>6</sub>) δ: 183.2, 166.6, 165.0, 163.8, 163.0, 158.7, 129.1, 124.2, 115.4, 106.0, 104.6, 98.7, 93.2, 56.4, 56.0\*; HR-ESI-MS *m/z* calcd. C<sub>16</sub><sup>13</sup>C<sub>1</sub>H<sub>15</sub>O<sub>5</sub> [M+H]<sup>+</sup>: 300.0947, found 300.0944.

**F. Synthesis of <sup>13</sup>C-4', <sup>12</sup>C-7-methylapigenenin (10).** <sup>13</sup>C-4'-methylapigenenin (11.1 mg, 0.039 mmol) dissolved in dry DMF (0.5 mL). Solid K<sub>2</sub>CO<sub>3</sub> (17.3 mg, 0.125 mmol) followed by <sup>12</sup>C-methyl iodide (5.3 μL, 0.086 mmol). After 18h at rt, EtOH (1 mL) was added and the mixture was dried by airflow. The residue was purified by flash chromatography (hexanes to 1:1 hexanes/EtOAc) to afford 8.3 mg of **01** (71%), as a colorless solid.

<sup>13</sup>C-4', <sup>12</sup>C-7-methylapigenenin (**10**): <sup>1</sup>H-NMR (500 MHz, acetone-*d*<sub>6</sub>) δ 12.96 (s, 1H), 8.05 (d, *J* = 9.1 Hz, 1H), 7.14 (d, *J* = 9.0 Hz, 1H), 6.73 (s, 1H), 6.71 (d, *J* = 2.3 Hz, 1H), 6.34 (d, *J* = 2.2 Hz, 1H), 3.93 (s, 3H), 3.92 (d, *J* = 144.8 Hz, 3H); <sup>13</sup>C-NMR (125 MHz, acetone-*d*<sub>6</sub>) δ: 183.2, 166.6, 165.0, 163.8, 163.1, 158.7, 129.1, 124.2, 115.4, 106.0, 104.6, 98.8, 93.3, 56.5\*, 56.0; HR-ESI-MS *m/z* calcd. C<sub>16</sub><sup>13</sup>C<sub>1</sub>H<sub>15</sub>O<sub>5</sub> [M+H]<sup>+</sup>: 300.0948, found 300.0944.

**G. Synthesis of <sup>13</sup>C-4', <sup>13</sup>C-7-methylapigenenin (11).** <sup>13</sup>C-4'-methylapigenenin (10.2 mg, 0.039 mmol) dissolved in dry DMF (0.5 mL). Solid K<sub>2</sub>CO<sub>3</sub> (15.9 mg, 0.115 mmol) followed by <sup>12</sup>C-methyl iodide (4.9 μL, 0.079 mmol). After 18h at rt, EtOH (1 mL) was added and the mixture was dried by airflow. The residue was purified by flash chromatography (hexanes to 1:1 hexanes/EtOAc) to afford 7.8 mg of **01** (73%), as a colorless solid.

<sup>13</sup>C-4', <sup>13</sup>C-7-methylapigenenin (**11**): <sup>1</sup>H-NMR (500 MHz, DMSO-*d*<sub>6</sub>) δ <sup>1</sup>H-NMR (500 MHz, acetone-*d*<sub>6</sub>) δ 12.96 (s, 1H), 8.05 (d, *J* = 9.0 Hz, 1H), 7.14 (d, *J* = 9.0 Hz, 1H), 6.72 (s, 1H), 6.71 (d, *J* = 2.2 Hz, 1H), 6.34 (d, *J* = 2.3 Hz, 1H), 3.93 (d, *J* = 145.4 Hz, 3H), 3.92 (d, *J* = 144.8 Hz, 3H); δ: 183.2, 166.6, 165.0, 163.8, 163.1, 158.7, 129.1, 124.2, 115.4, 106.0, 104.5, 98.7, 93.2, 56.6\*, 56.0\*; HR-ESI-MS *m/z* calcd. C<sub>15</sub><sup>13</sup>C<sub>2</sub>H<sub>15</sub>O<sub>5</sub> [M+H]<sup>+</sup>: 301.0981, found 301.0979.

**H. Mixture preparation and analysis.** Solutions of compounds were prepared in volumetric flasks at 100.0±0.1 μM in CH<sub>2</sub>Cl<sub>2</sub>. A volume of the minor components was added to a second 100 mL volumetric flask using a syringe with accuracy to ±0.1 mL. The volumetric flask was then filled with the major component and mixed. The resulting solution was then dried on a rotary evaporator. The resulting mixtures were conducted by NMR analyses in acetone-*d*<sub>6</sub>.

<sup>1</sup>H-NMR (500 MHz) spectra of **00**, **01**, **10**, and **11**

**00** in d<sub>6</sub>-acetone

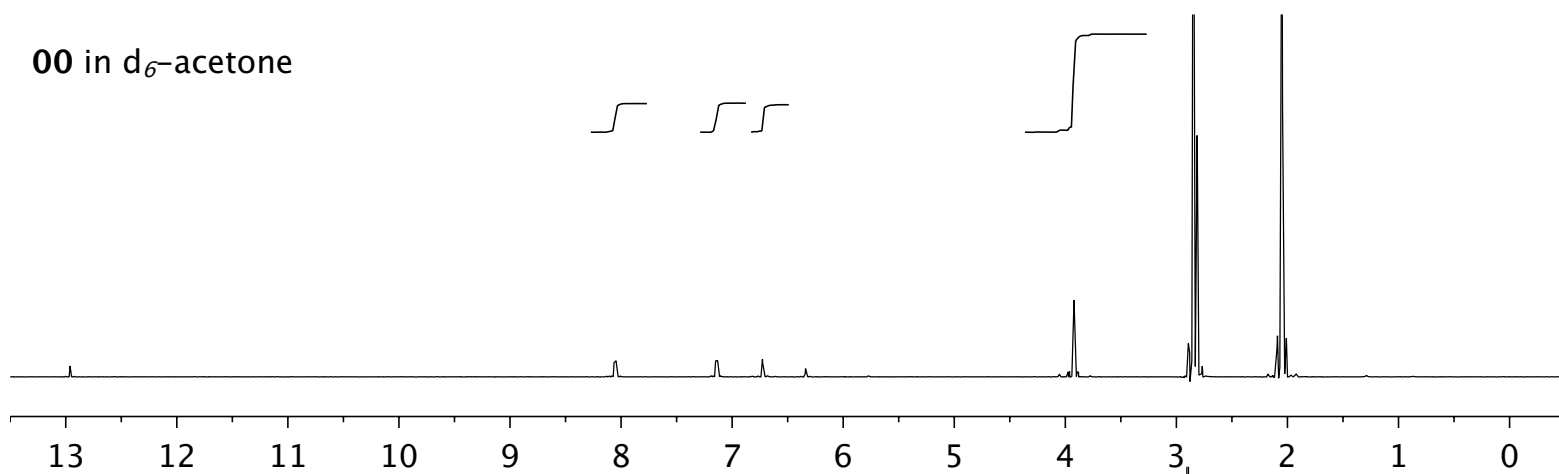

**01** in d<sub>6</sub>-acetone

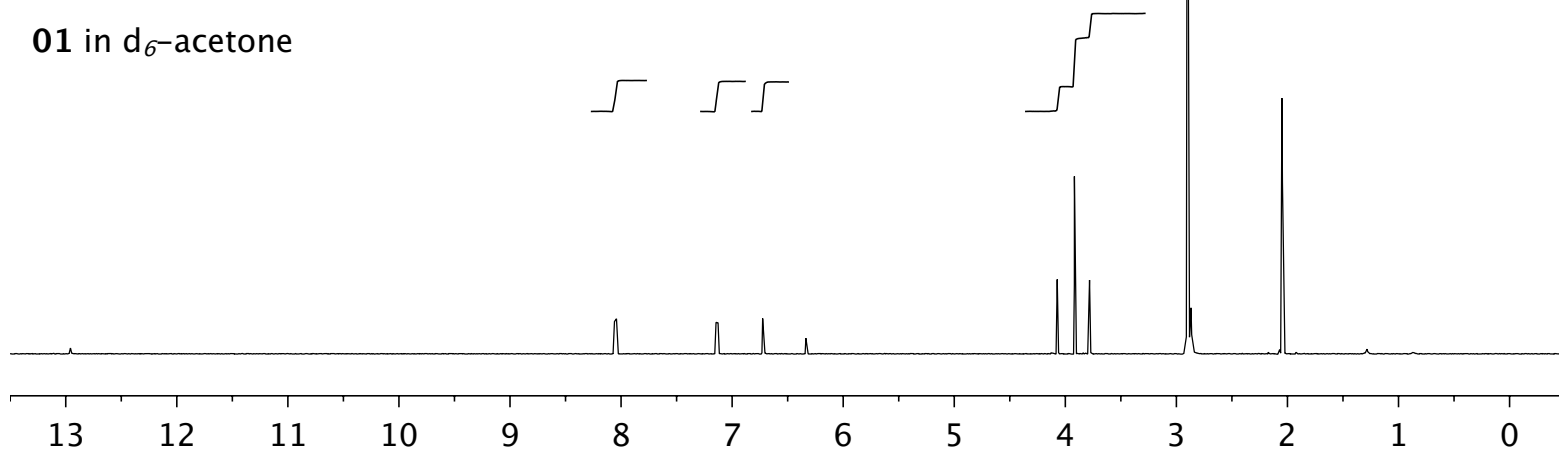

**10** in d<sub>6</sub>-acetone

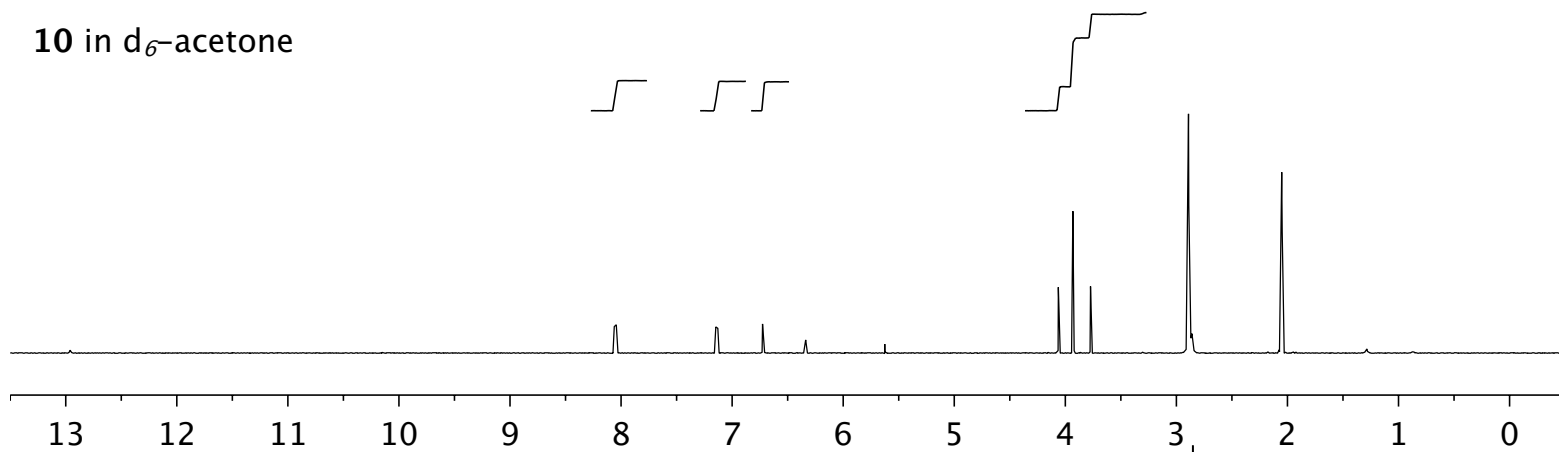

**11** in d<sub>6</sub>-acetone

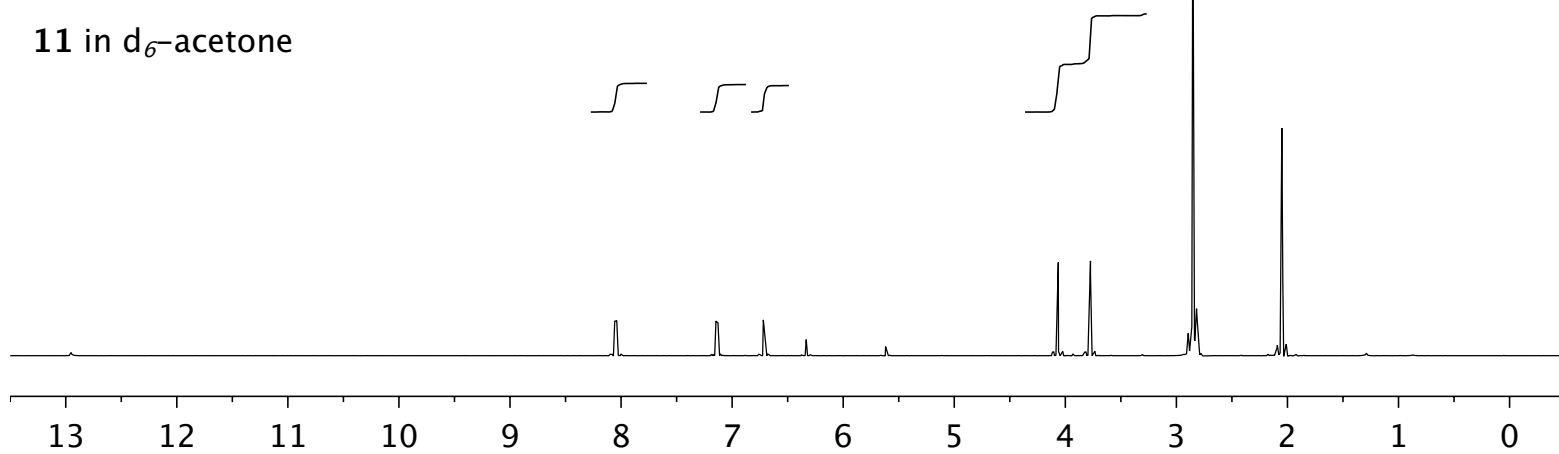

<sup>1</sup>H-NMR (500 MHz) spectra of **00**, **01**, **10**, and **11**

**00** in d<sub>6</sub>-acetone

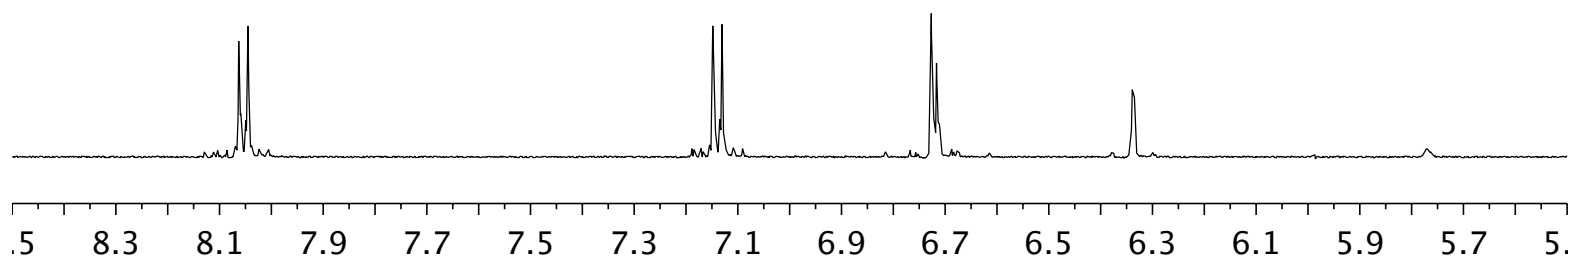

**01** in d<sub>6</sub>-acetone

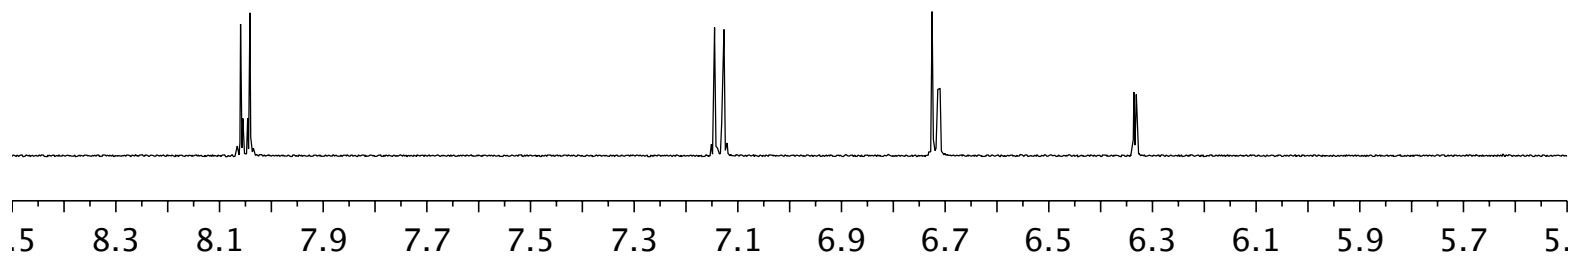

**10** in d<sub>6</sub>-acetone

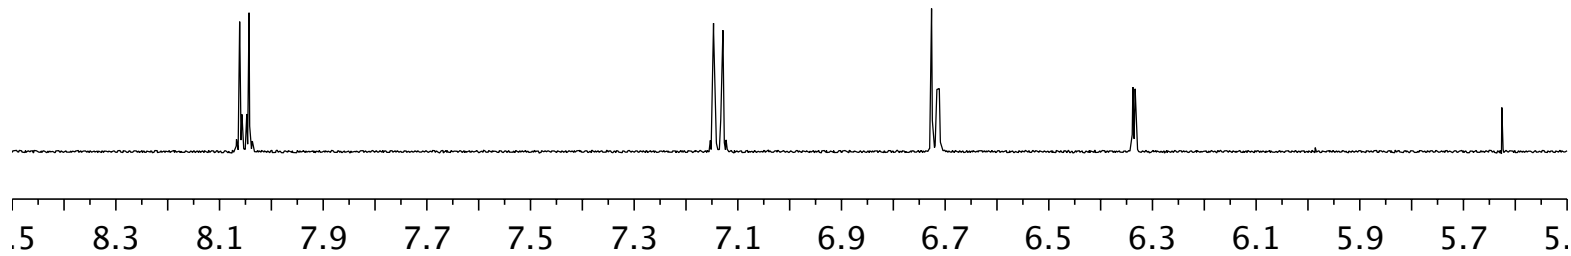

**11** in d<sub>6</sub>-acetone

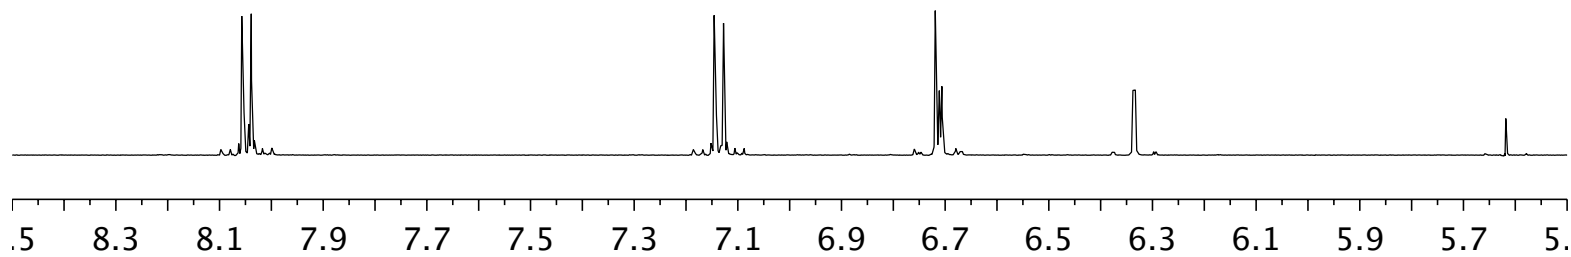

<sup>1</sup>H-NMR (500 MHz) spectra of **00**, **01**, **10**, and **11**

**00** in d<sub>6</sub>-acetone

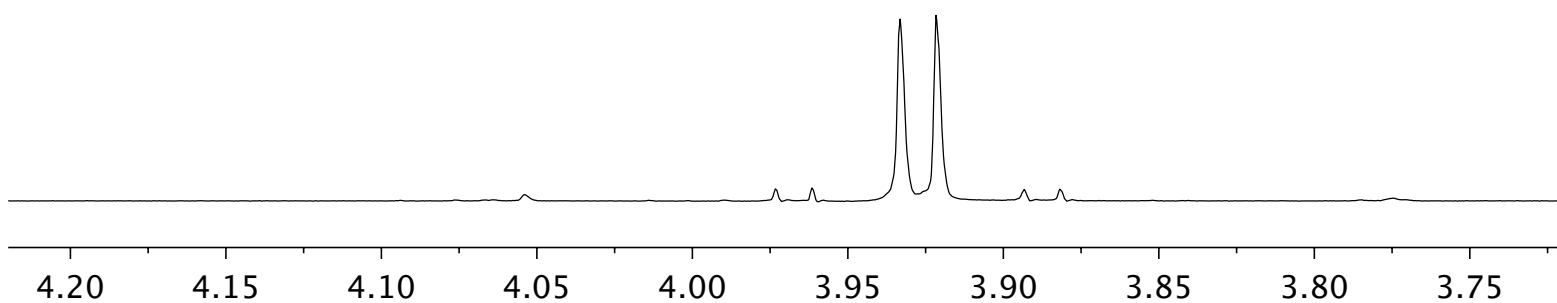

**01** in d<sub>6</sub>-acetone

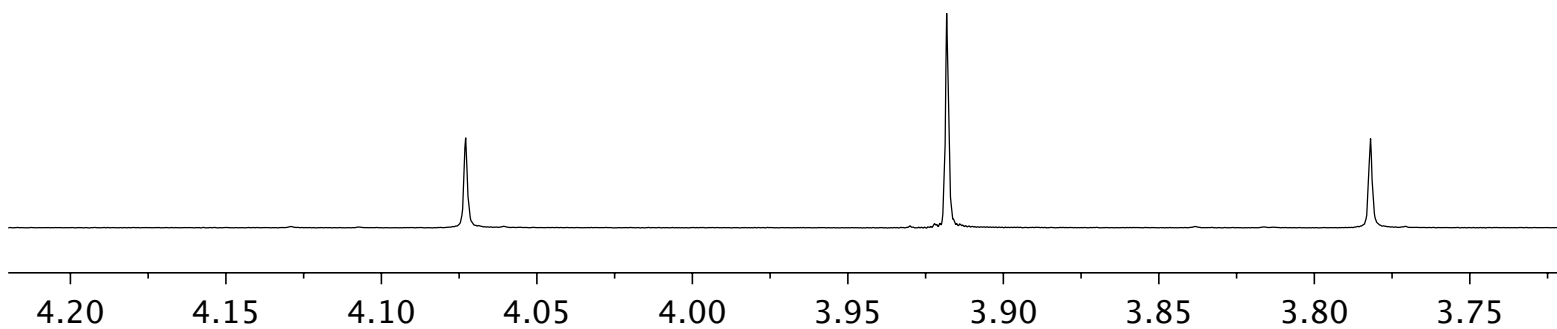

**10** in d<sub>6</sub>-acetone

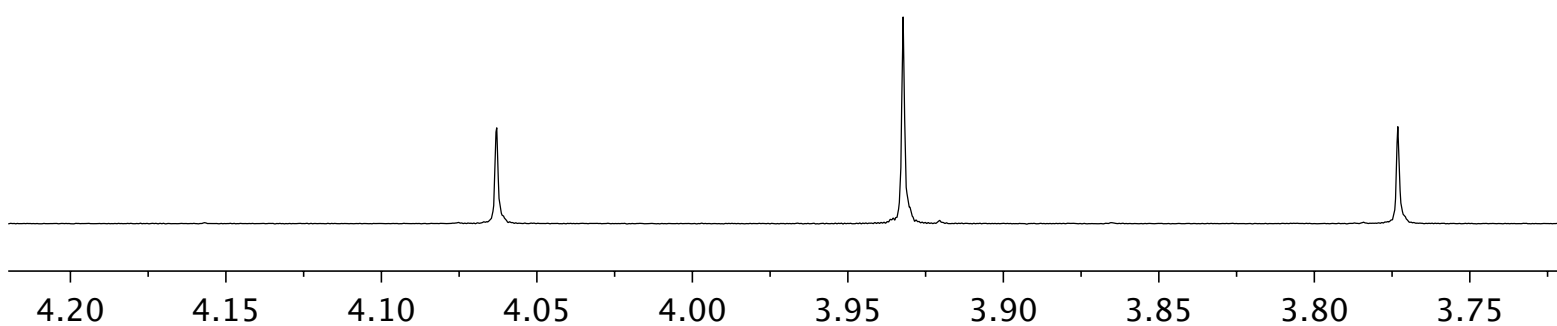

**11** in d<sub>6</sub>-acetone

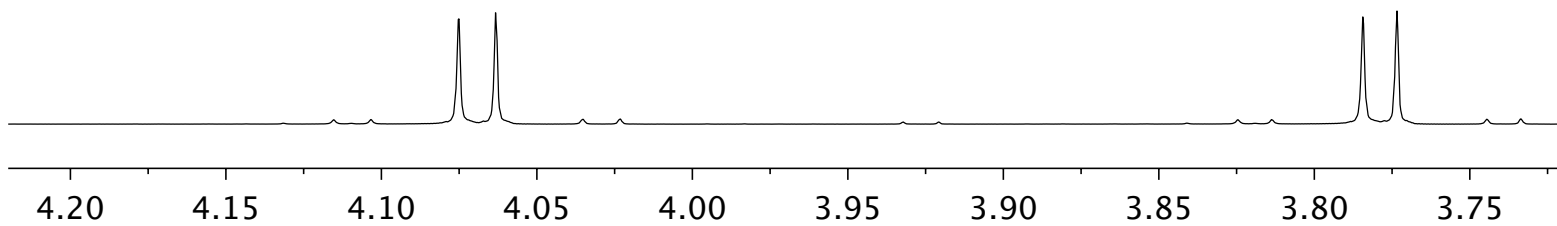

An expansion of the  $^1\text{H}$ ,  $^1\text{H}$ -NOESY (500 MHz) spectrum of **00** in  $\text{d}_6$ -acetone

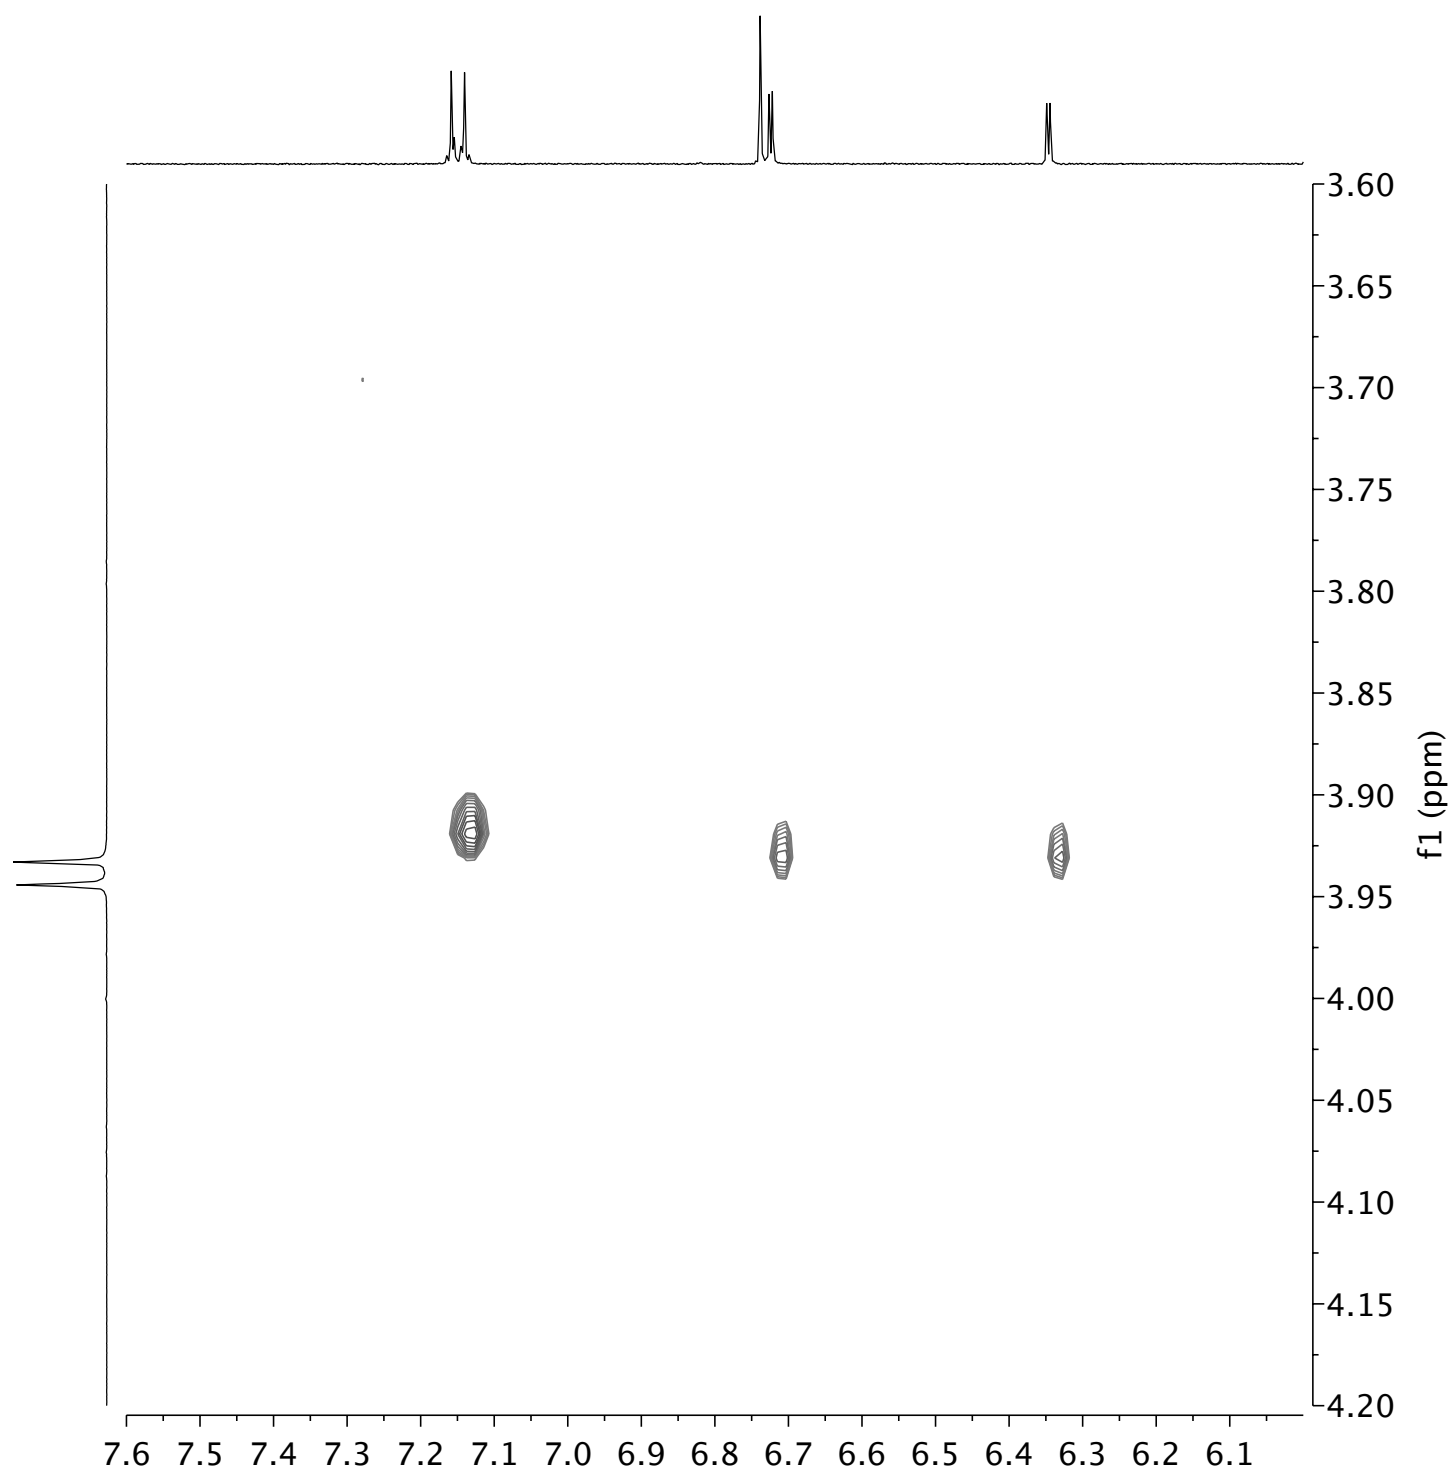



An expansion of the  $^1\text{H}, ^1\text{H}$ -NOESY (500 MHz) spectrum of **01** in  $\text{d}_6$ -acetone

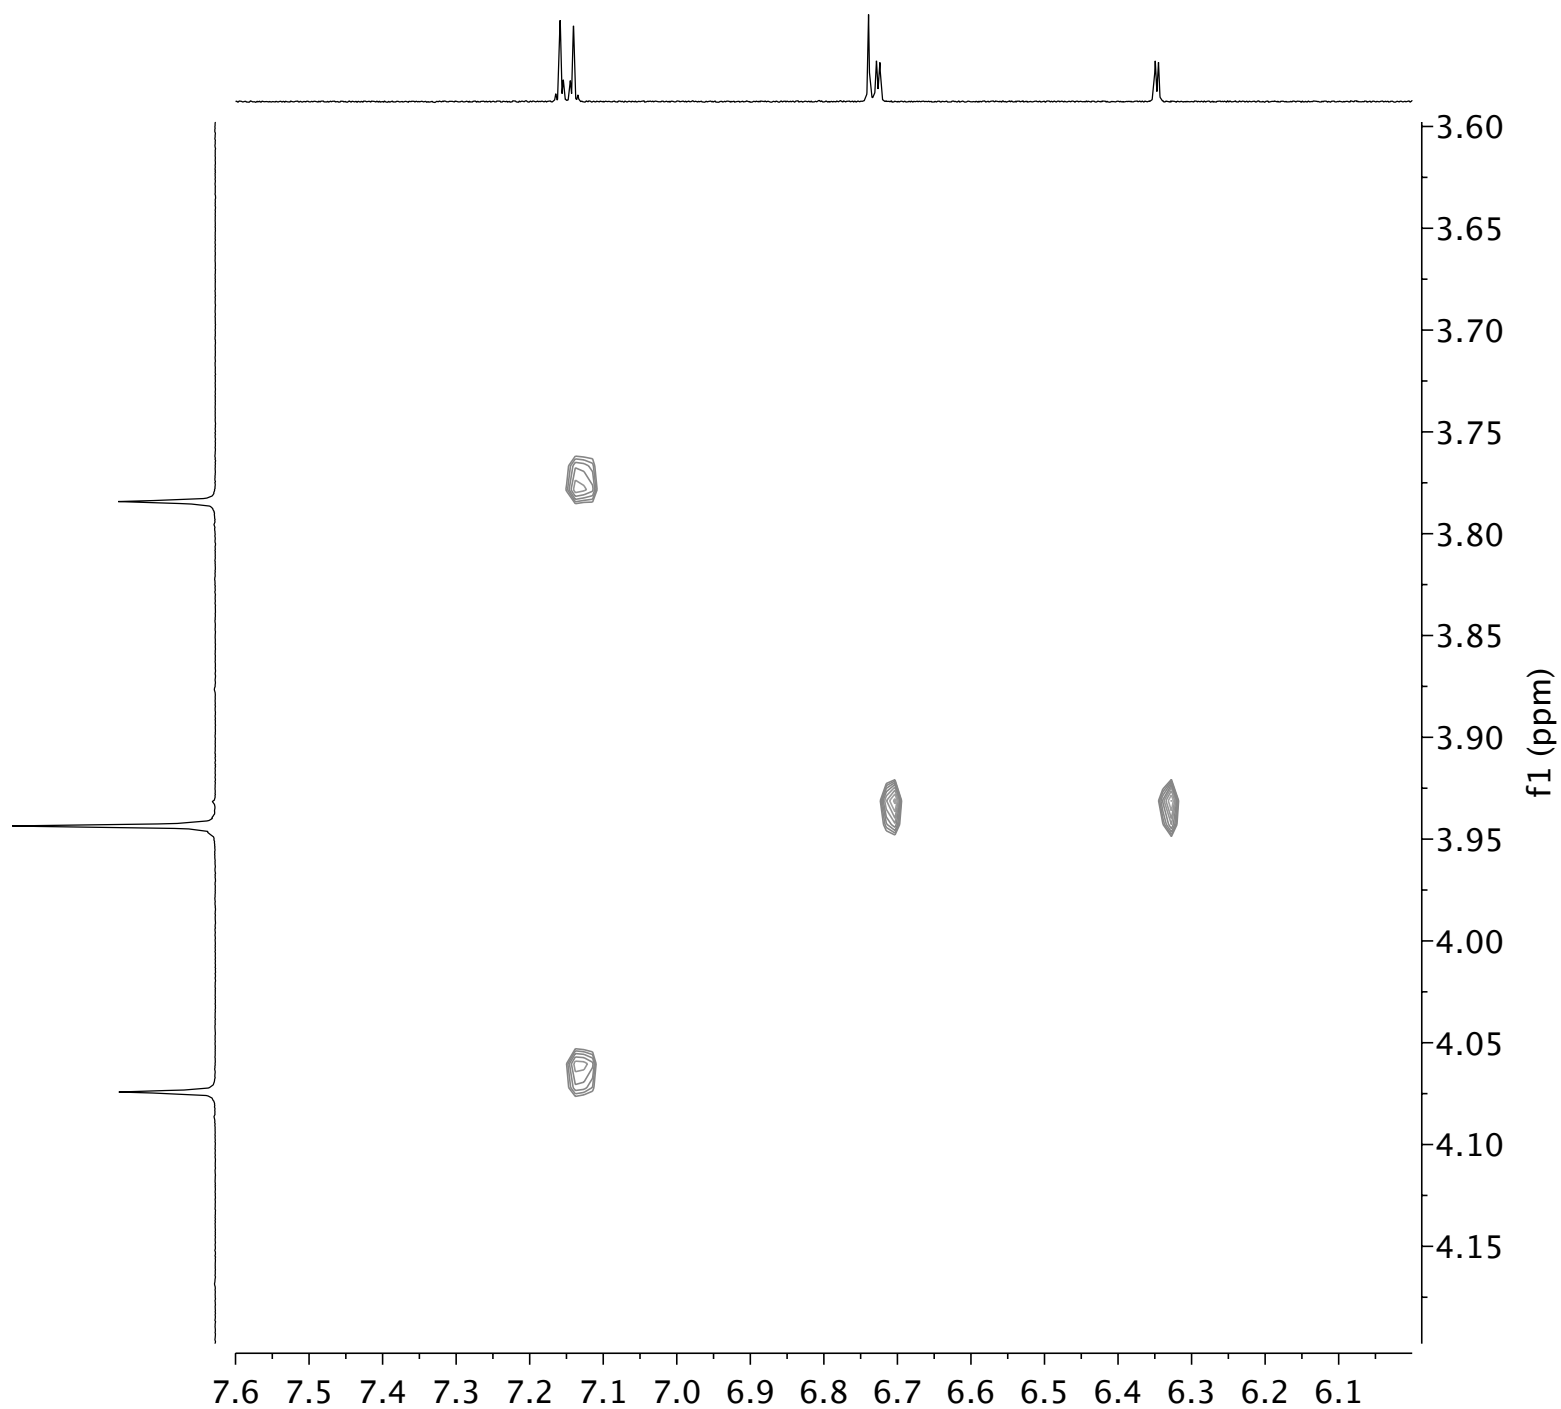

An expansion of the  $^1\text{H}$ ,  $^1\text{H}$ -NOESY (500 MHz) spectrum of **00** in  $\text{d}_6$ -acetone

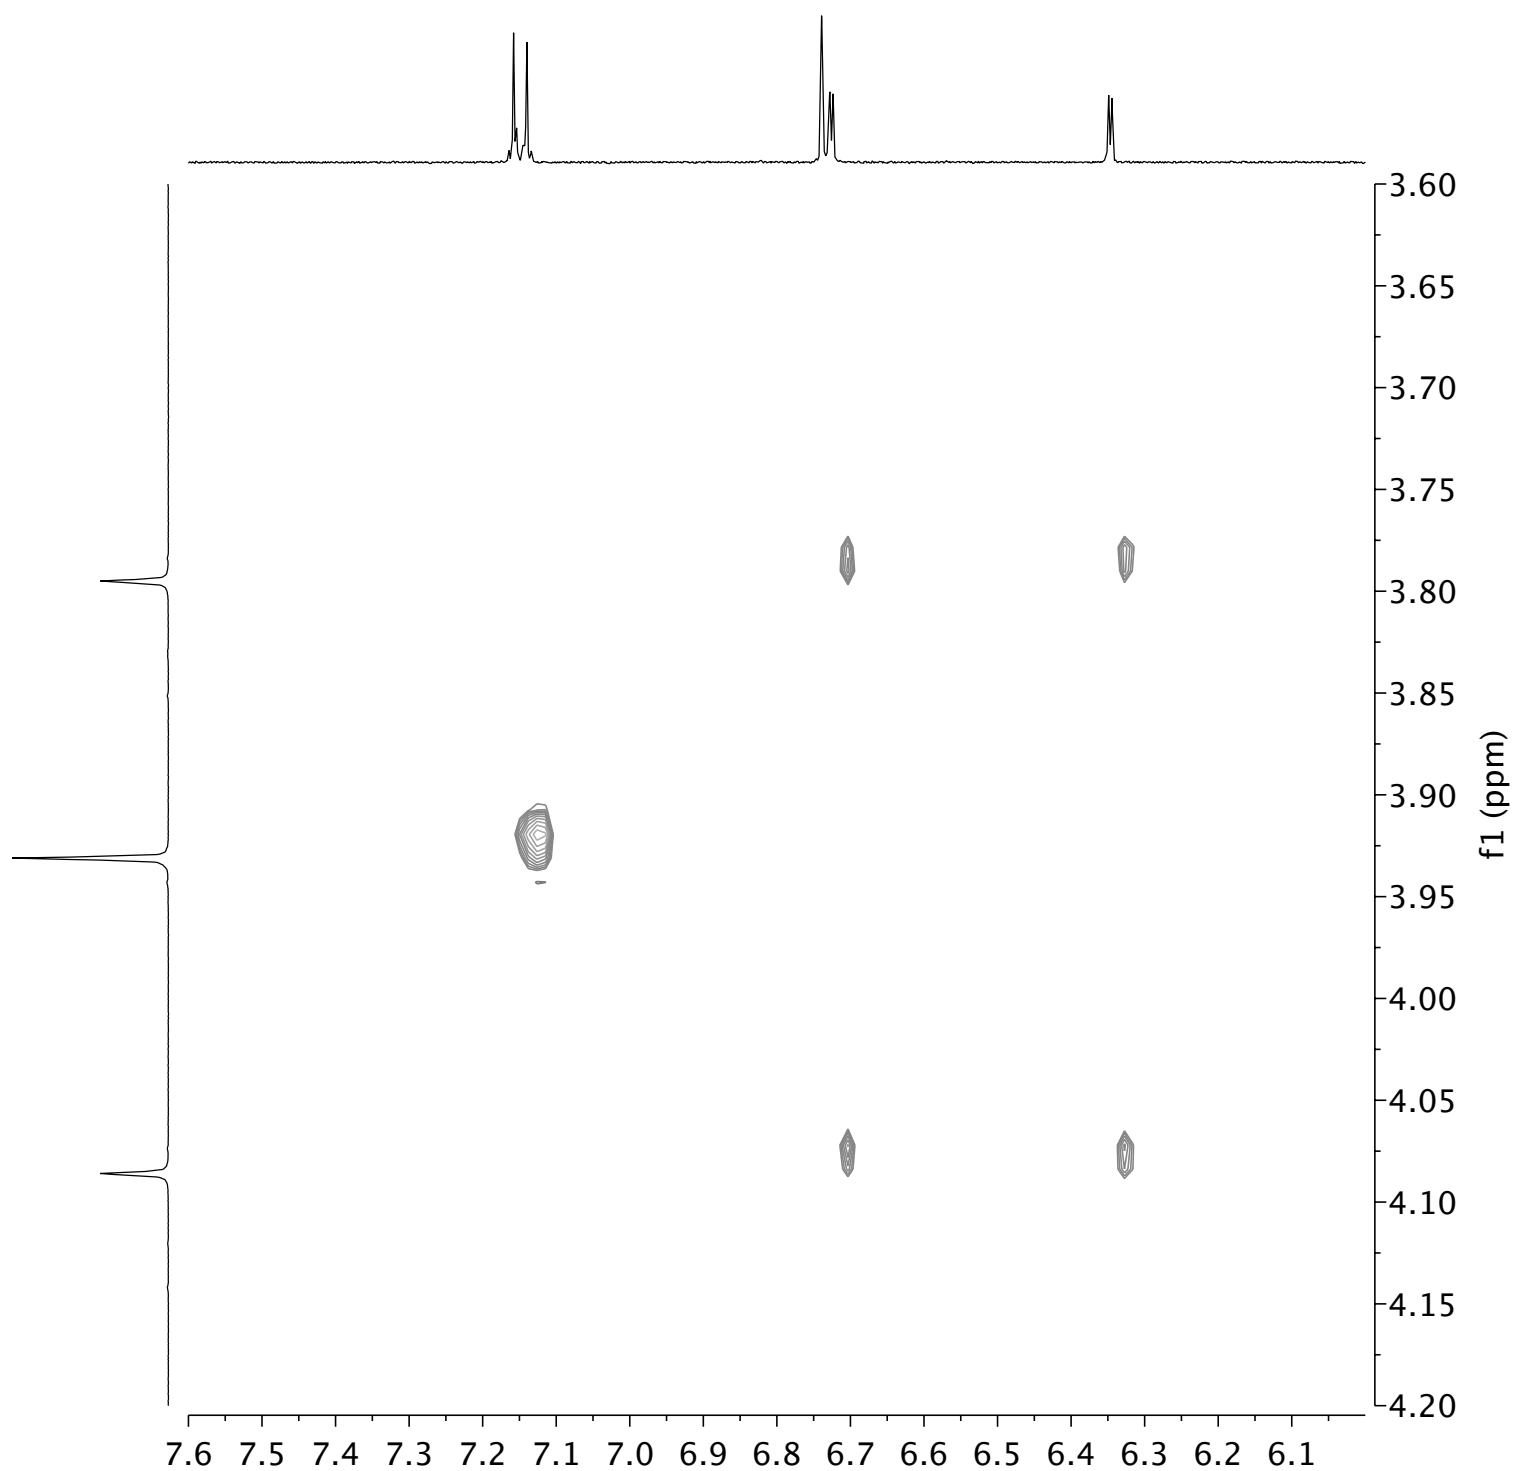

An expansion of the  $^1\text{H}$ ,  $^1\text{H}$ -NOESY (500 MHz) spectrum of **11** in  $\text{d}_6$ -acetone

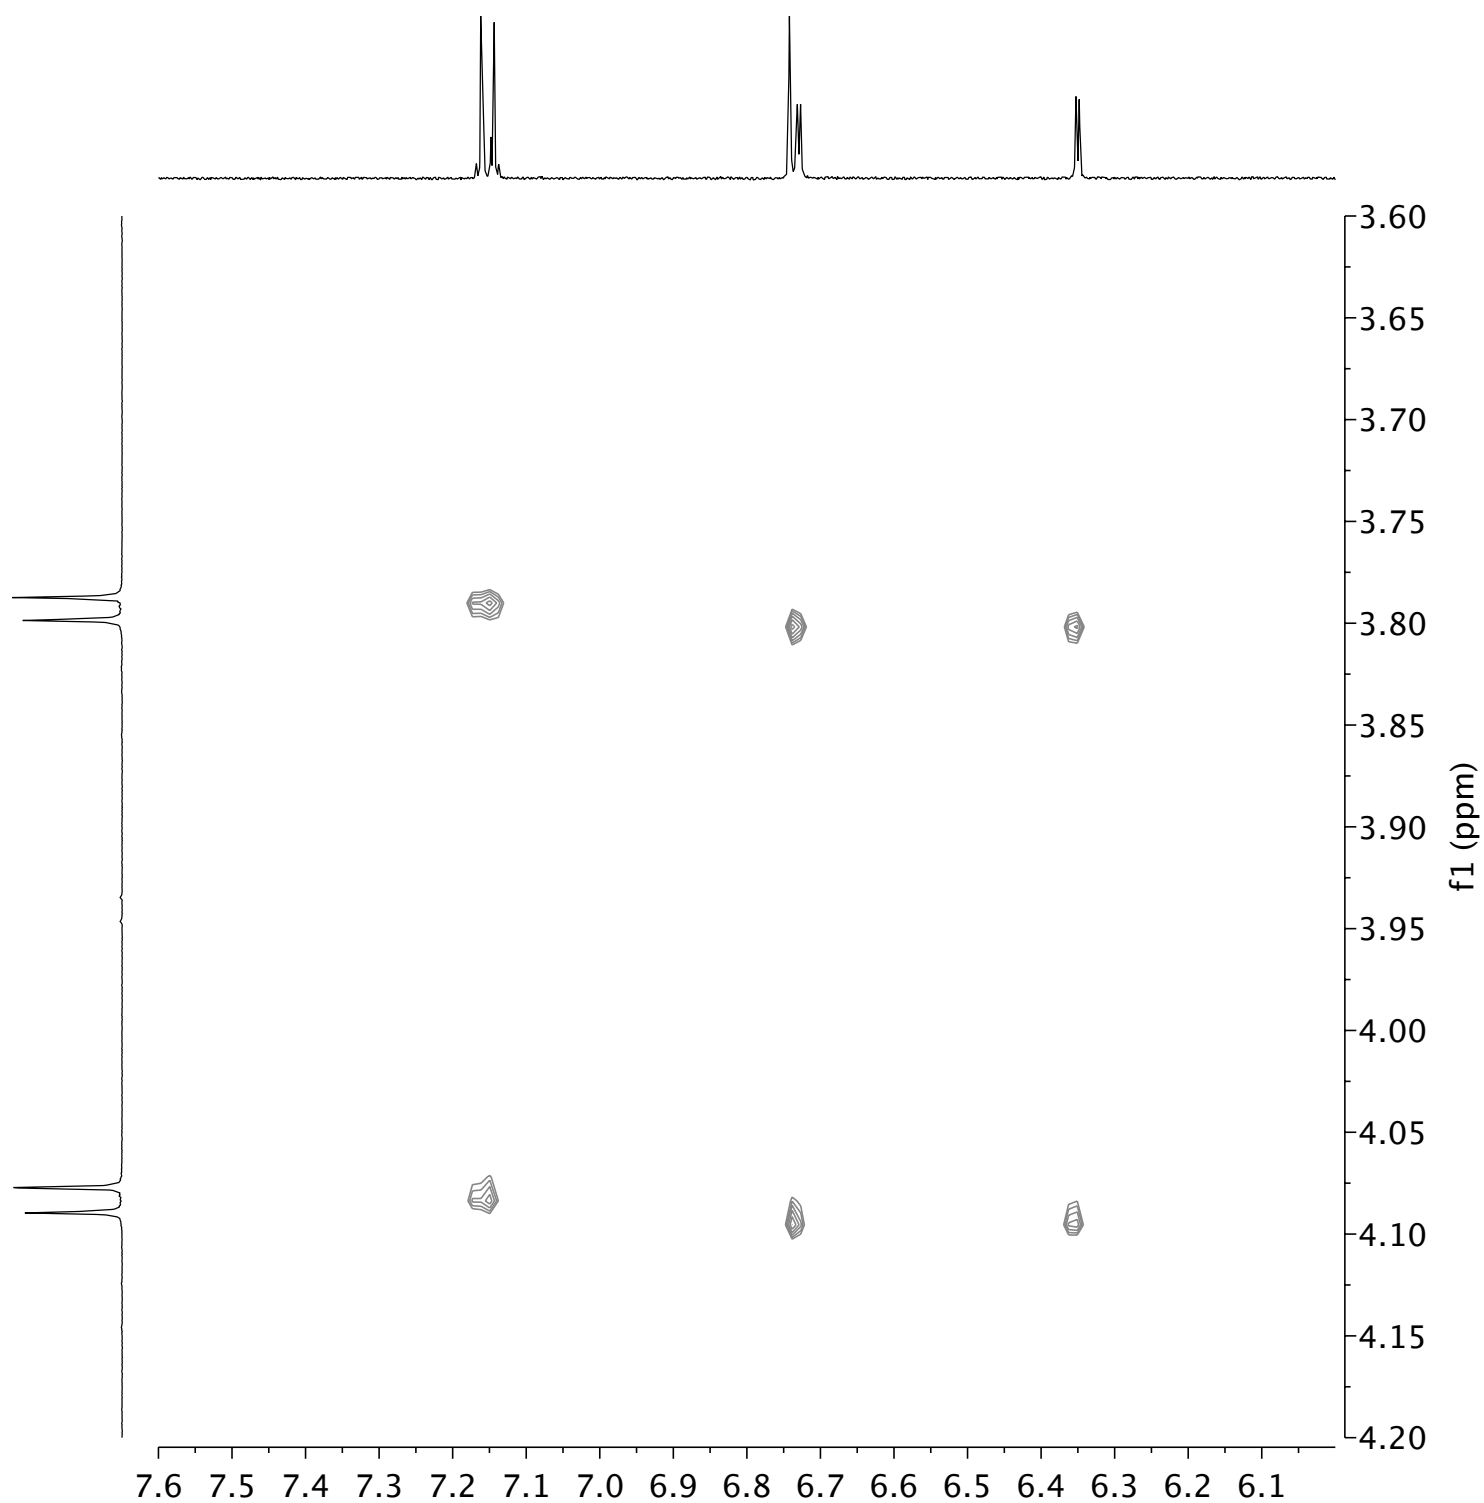

$^{13}\text{C}$ -NMR (125 MHz) spectra of **00**, **01**, **10**, and **11**

**00** in  $\text{d}_6$ -acetone

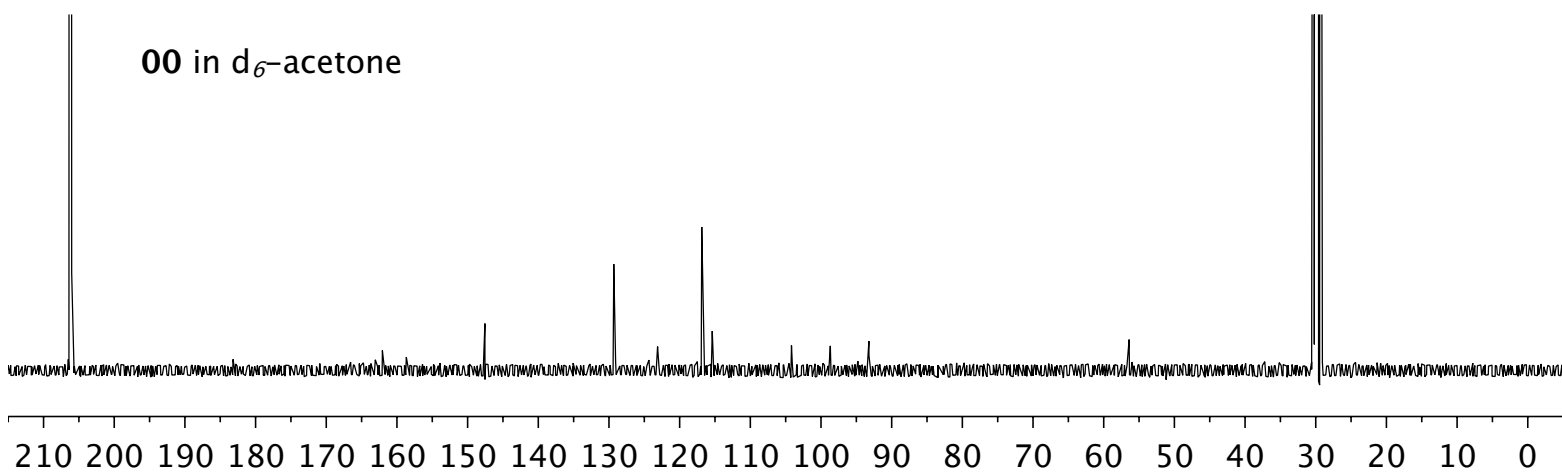

**01** in  $\text{d}_6$ -acetone

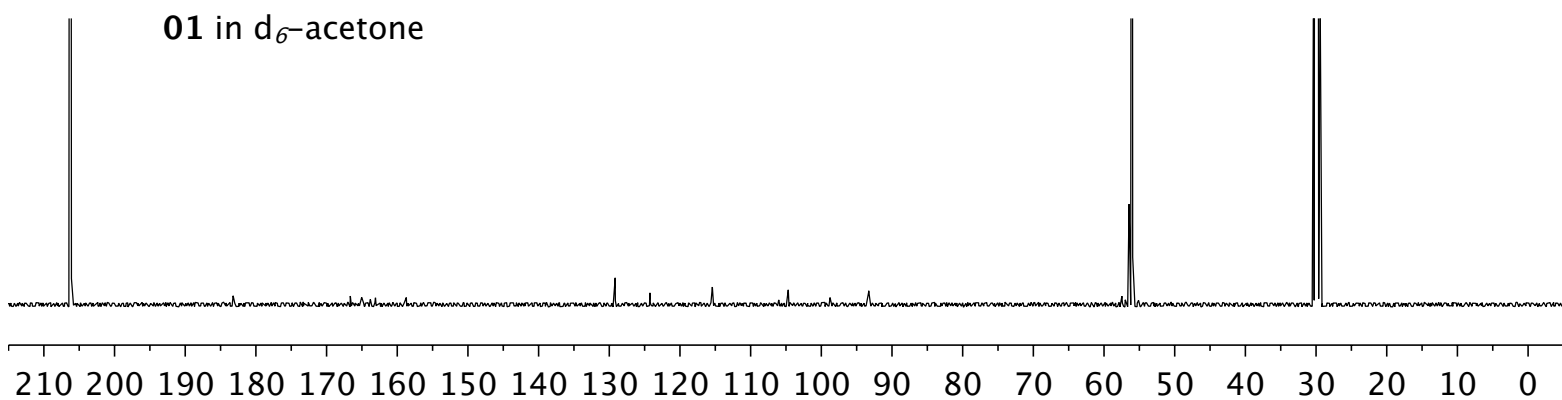

**10** in  $\text{d}_6$ -acetone

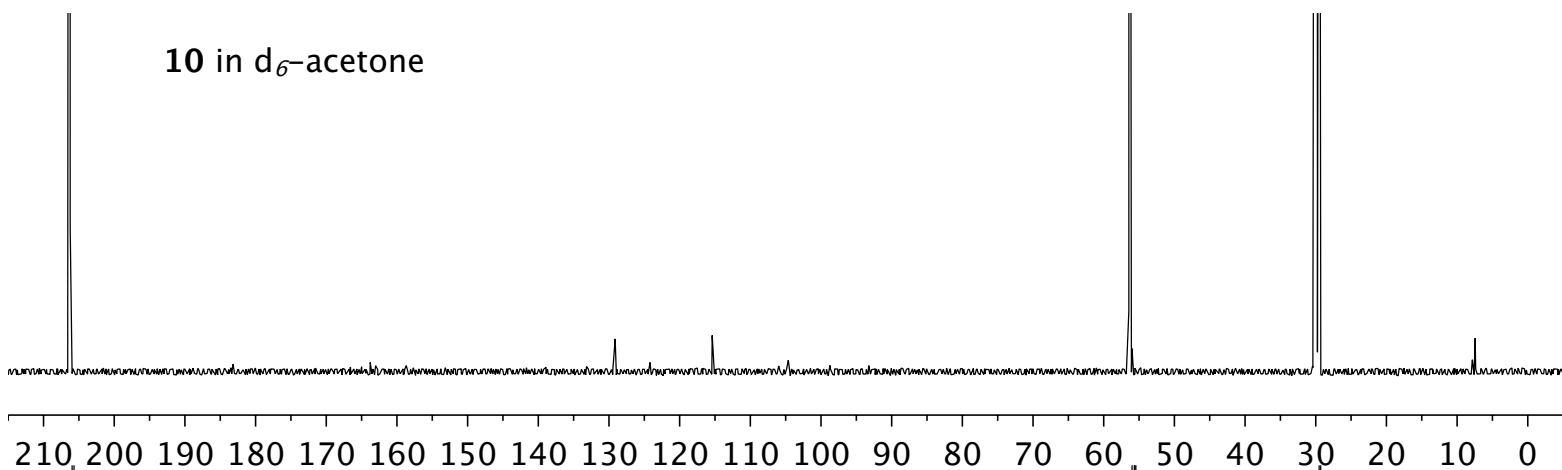

**11** in  $\text{d}_6$ -acetone

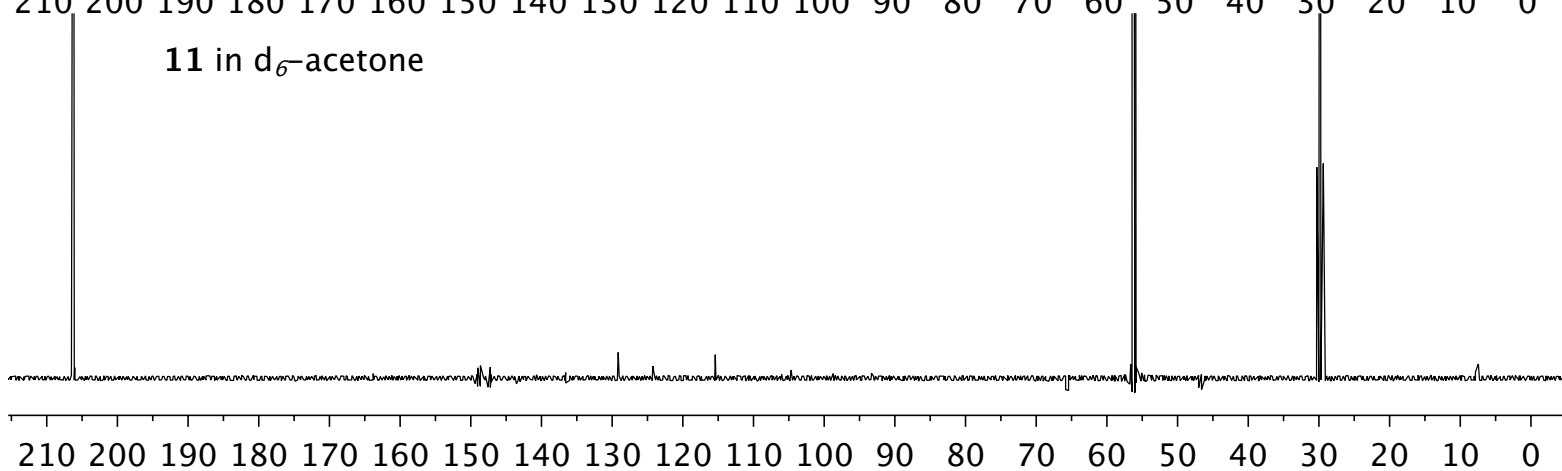

<sup>13</sup>C-NMR (125 MHz) spectra of **00**, **01**, **10**, and **11**

**00** in d<sub>6</sub>-acetone

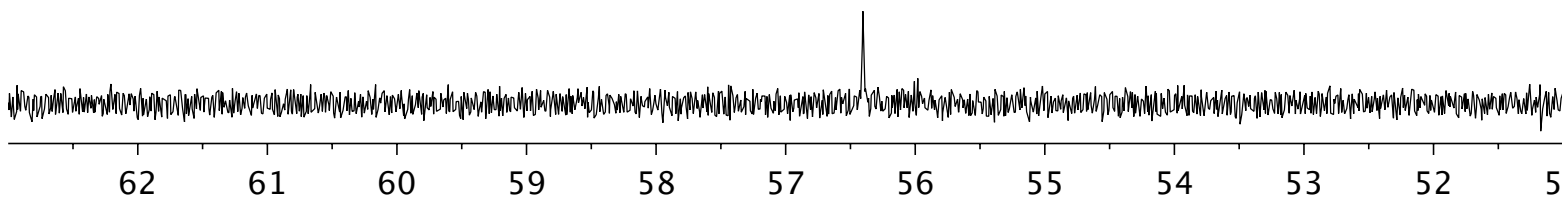

**01** in d<sub>6</sub>-acetone

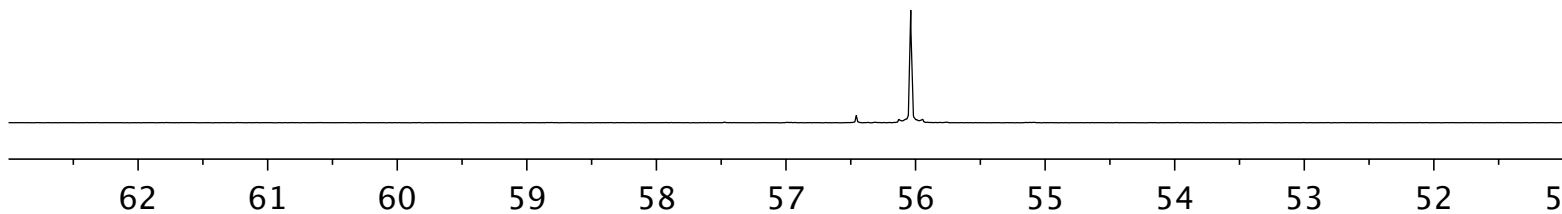

**10** in d<sub>6</sub>-acetone

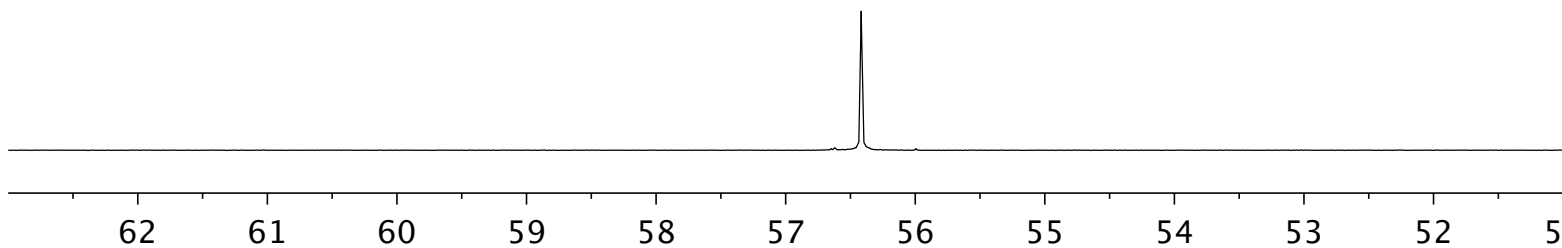

**11** in d<sub>6</sub>-acetone

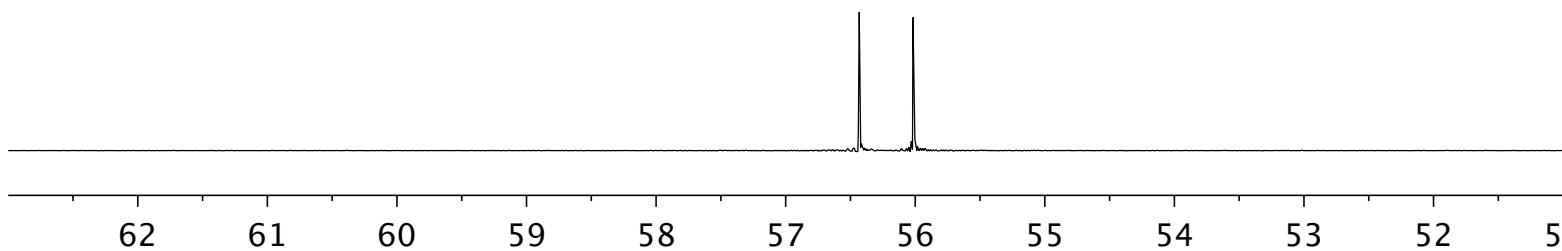

$^1\text{H}$ -NMR (500 MHz) spectra of **100000**, **000100**, and **100100** as shown in Fig. 4

**100000** in  $\text{d}_6$ -acetone

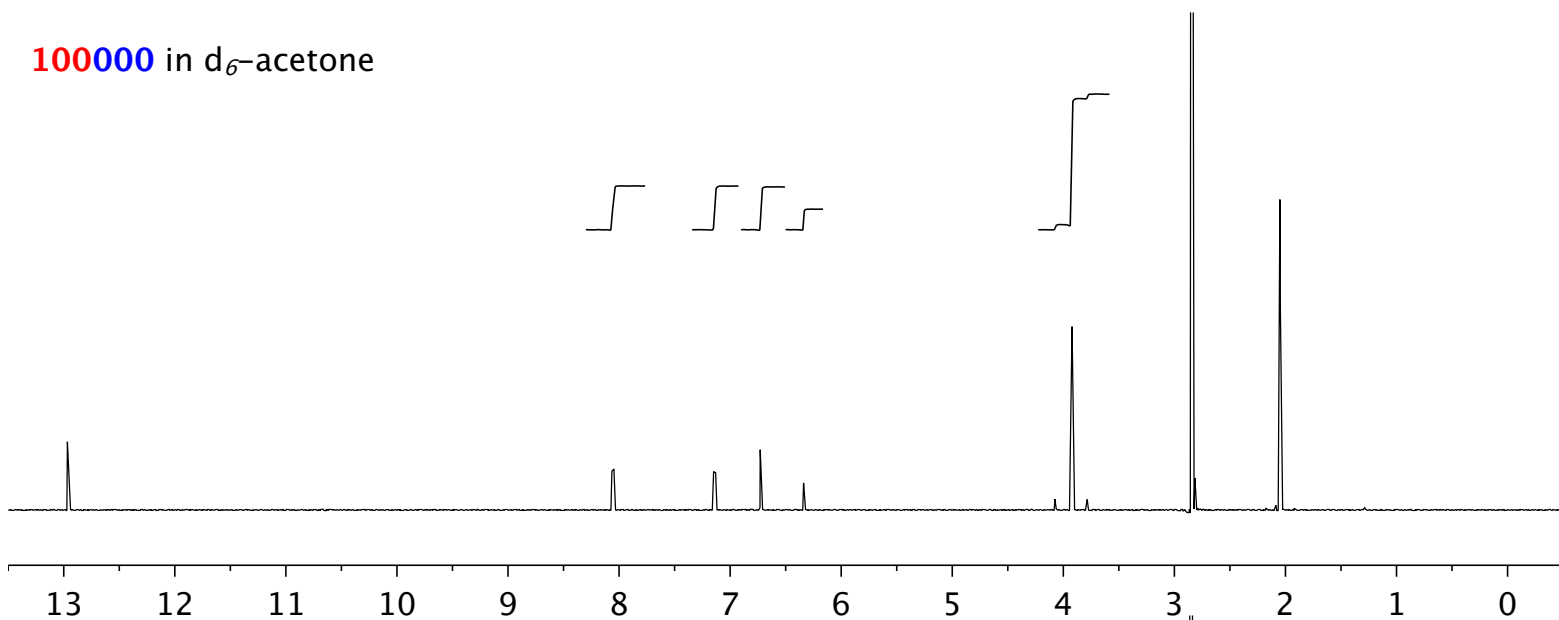

**000100** in  $\text{d}_6$ -acetone

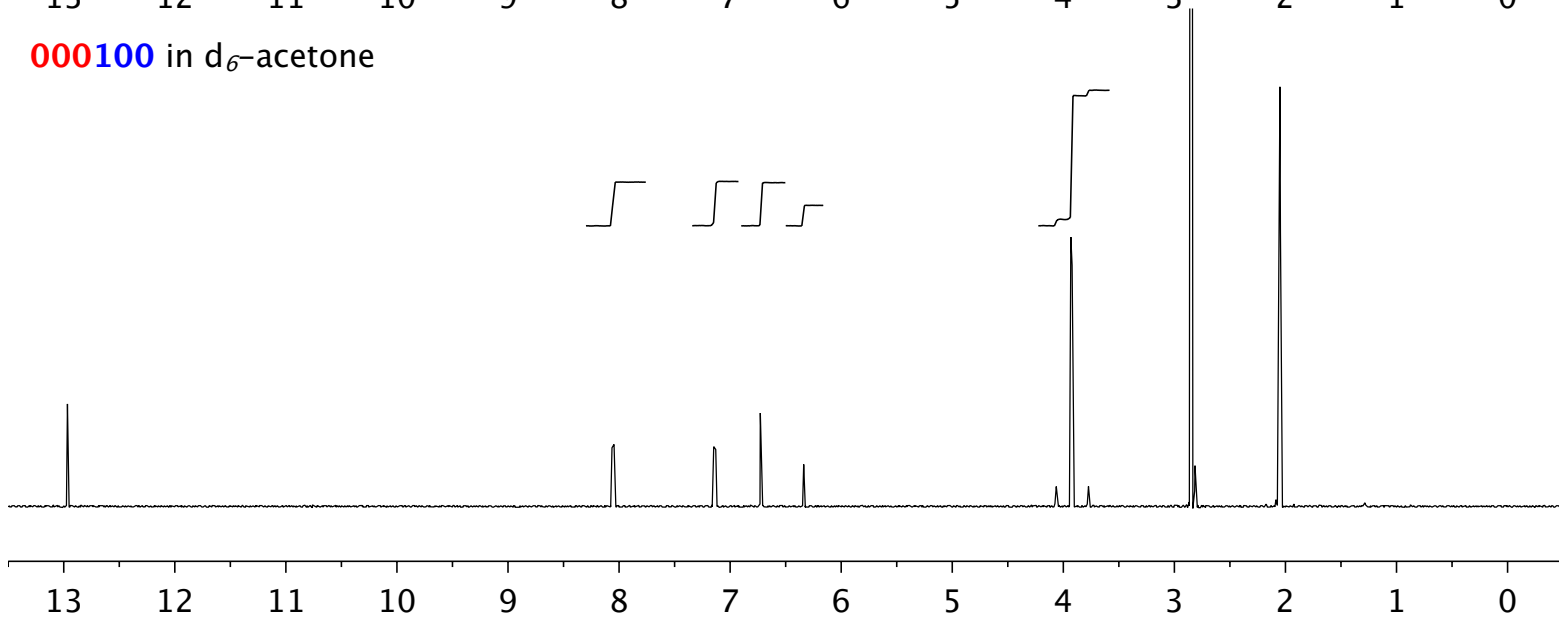

**100100** in  $\text{d}_6$ -acetone

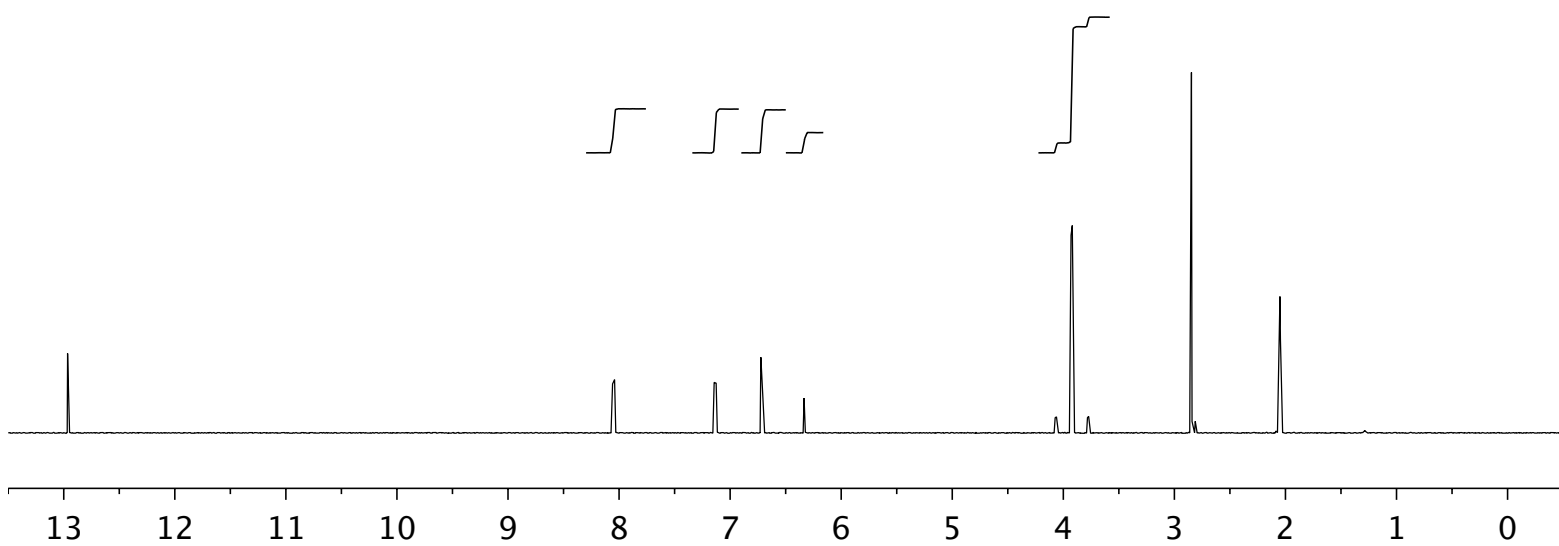

$^1\text{H}$ -NMR (500 MHz) spectra of **100000**, **000100**, and **100100** as shown in Fig. 4

**100000** in  $\text{d}_6$ -acetone

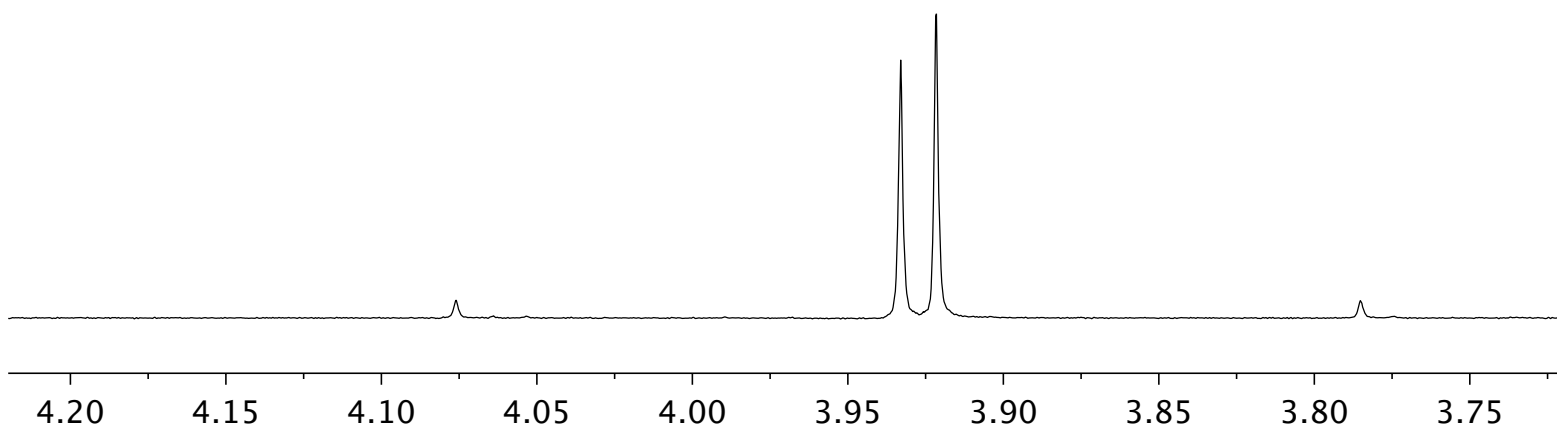

**000100** in  $\text{d}_6$ -acetone

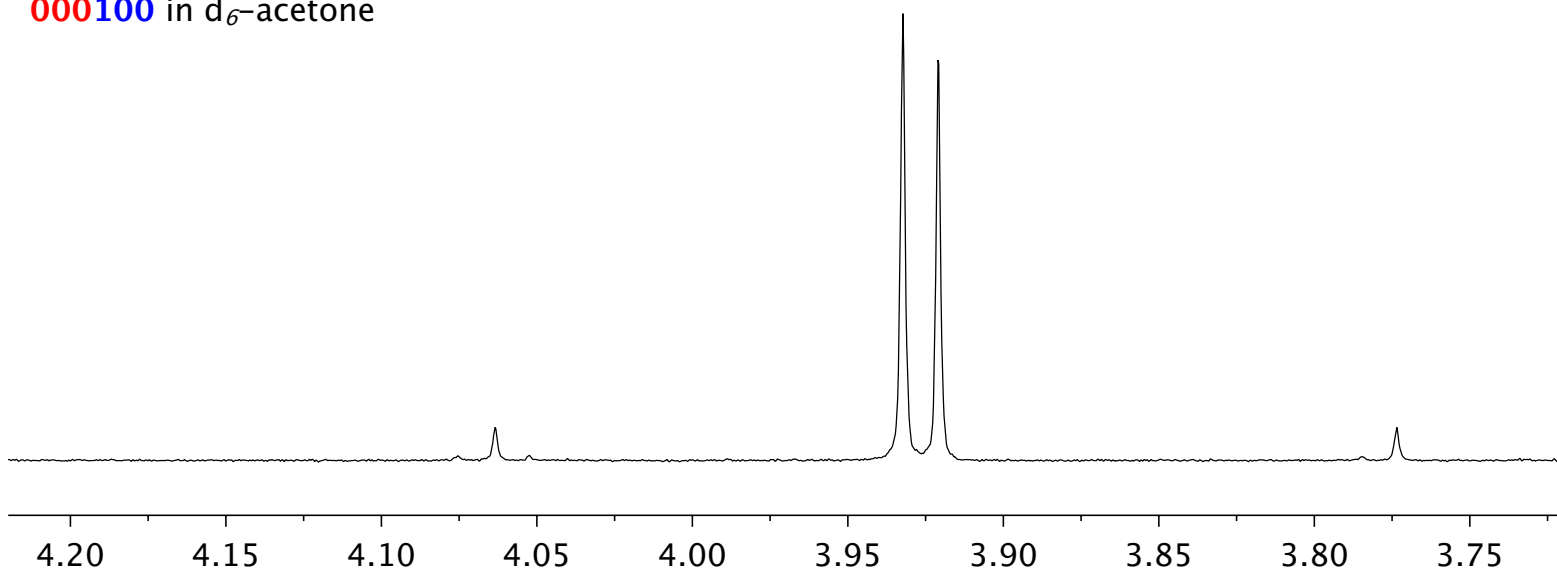

**100100** in  $\text{d}_6$ -acetone

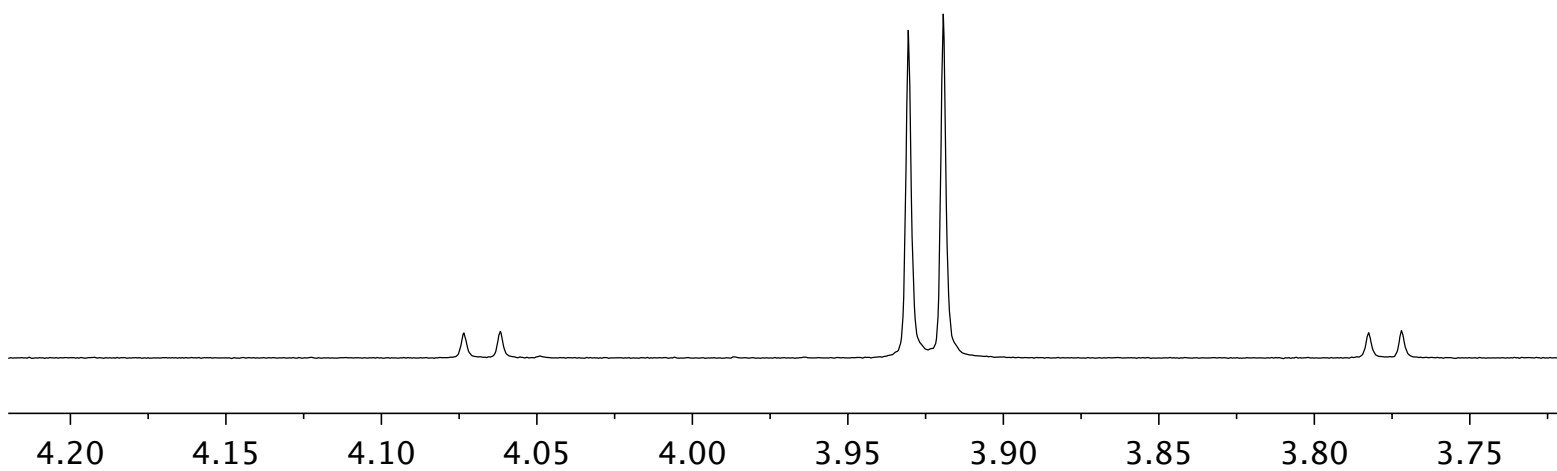

$^1\text{H}$ -NMR (500 MHz) spectra of applied **100000** and isolated **000100** as shown in Fig. 5

applied **100000** in  $\text{d}_6$ -acetone

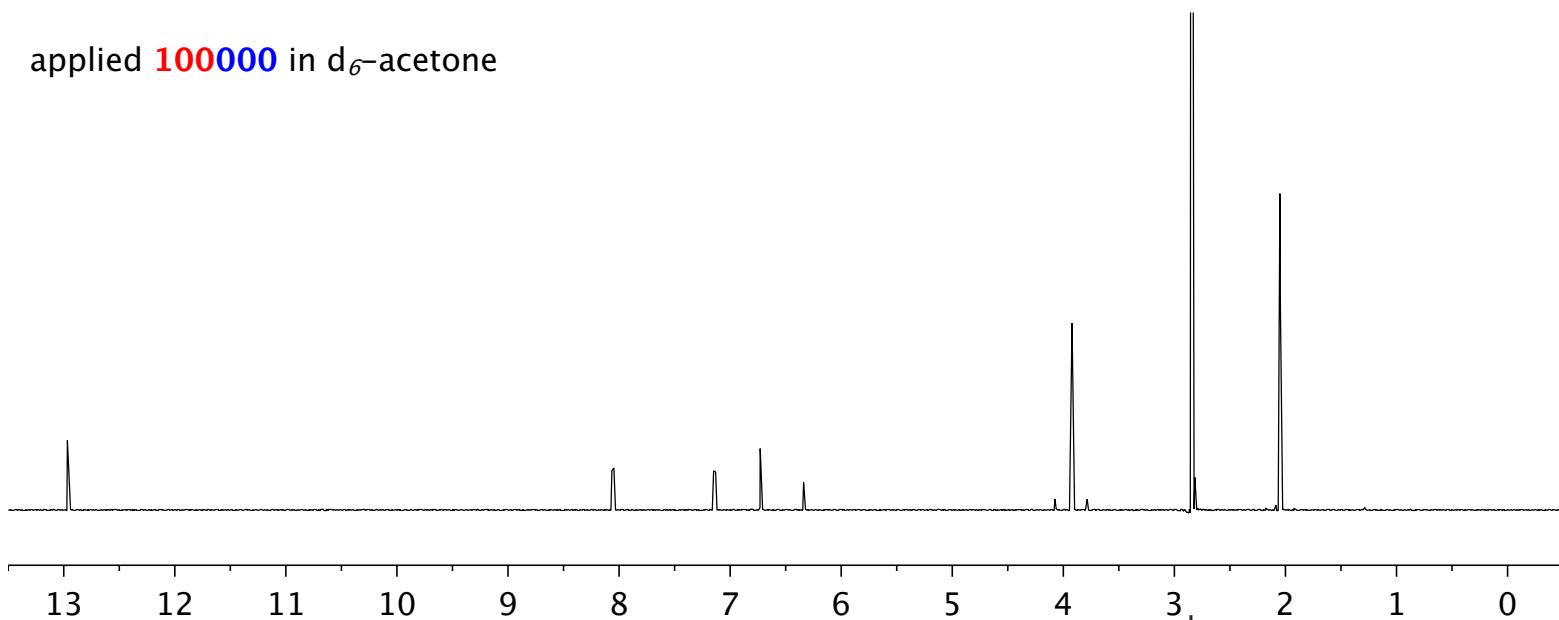

isolated **100000** in  $\text{d}_6$ -acetone

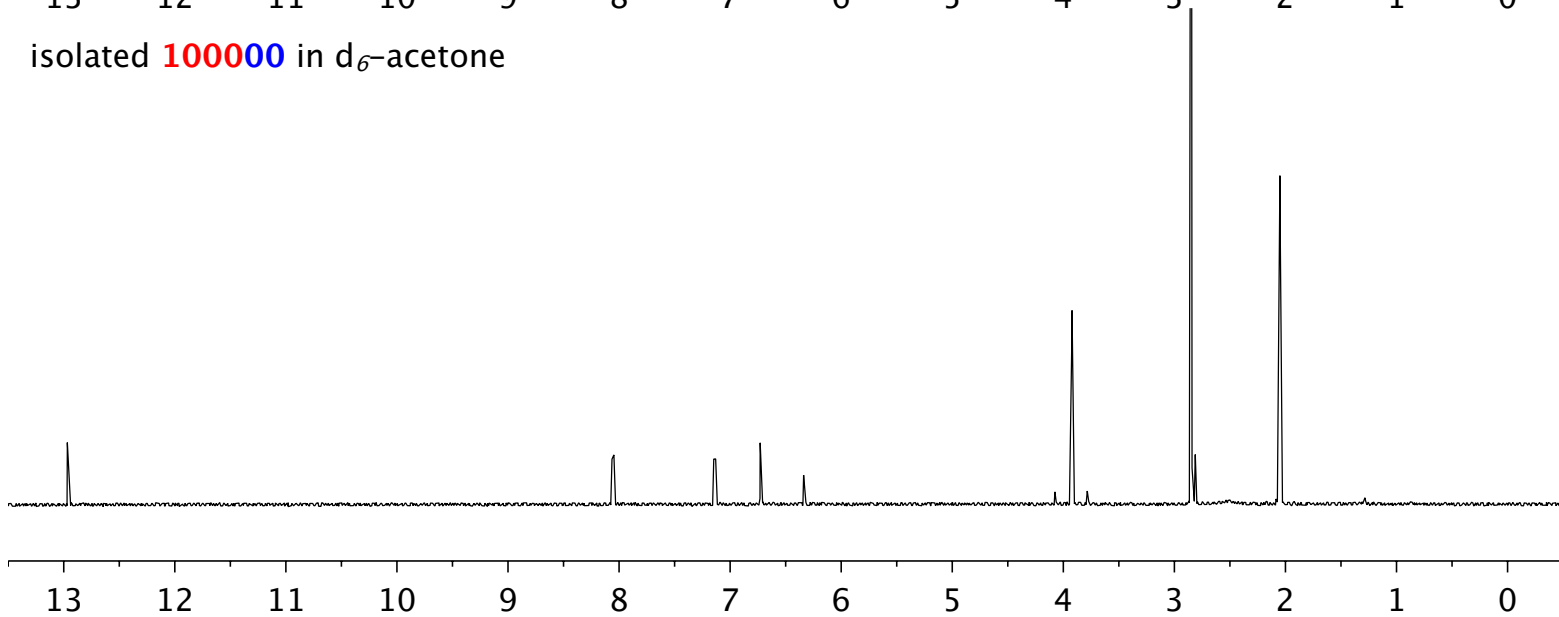



$^1\text{H}$ -NMR (500 MHz) spectra of applied **100000** and isolated **000100** as shown in Fig. 5

applied **100000** in  $\text{d}_6$ -acetone

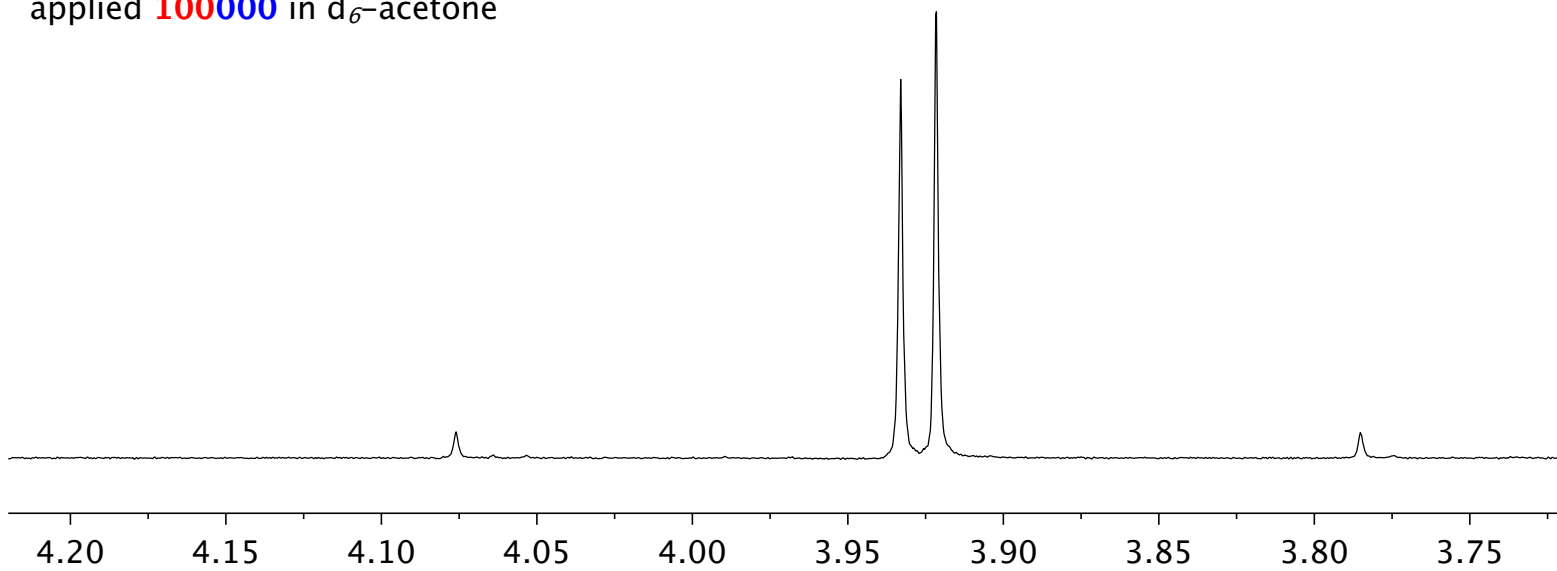

isolated **100000** in  $\text{d}_6$ -acetone

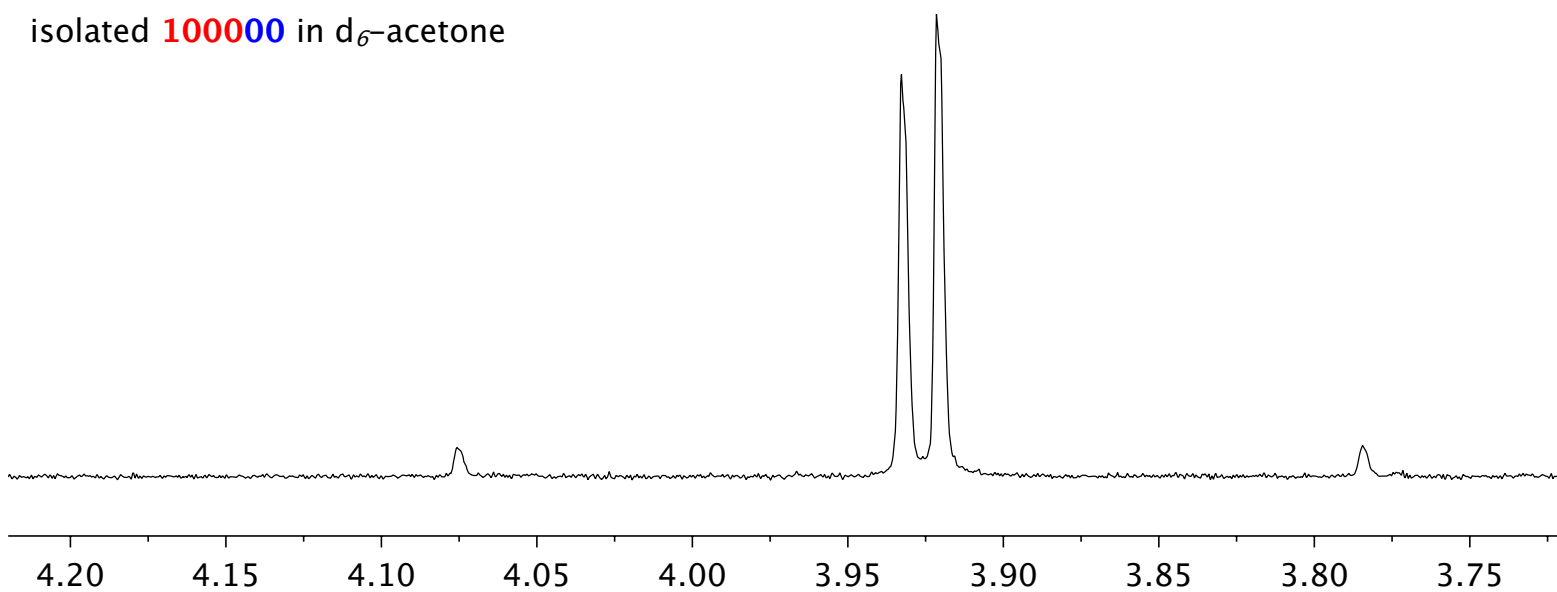

**Stability analyses on materials stored at rt.** These spectra were collected on materials prepared in 06/2009 and stored in vials. NMR spectra were collected in 01/2018. These spectra show no decomposition when compared with that presented on page S5.

**10** in  $d_6$ -acetone

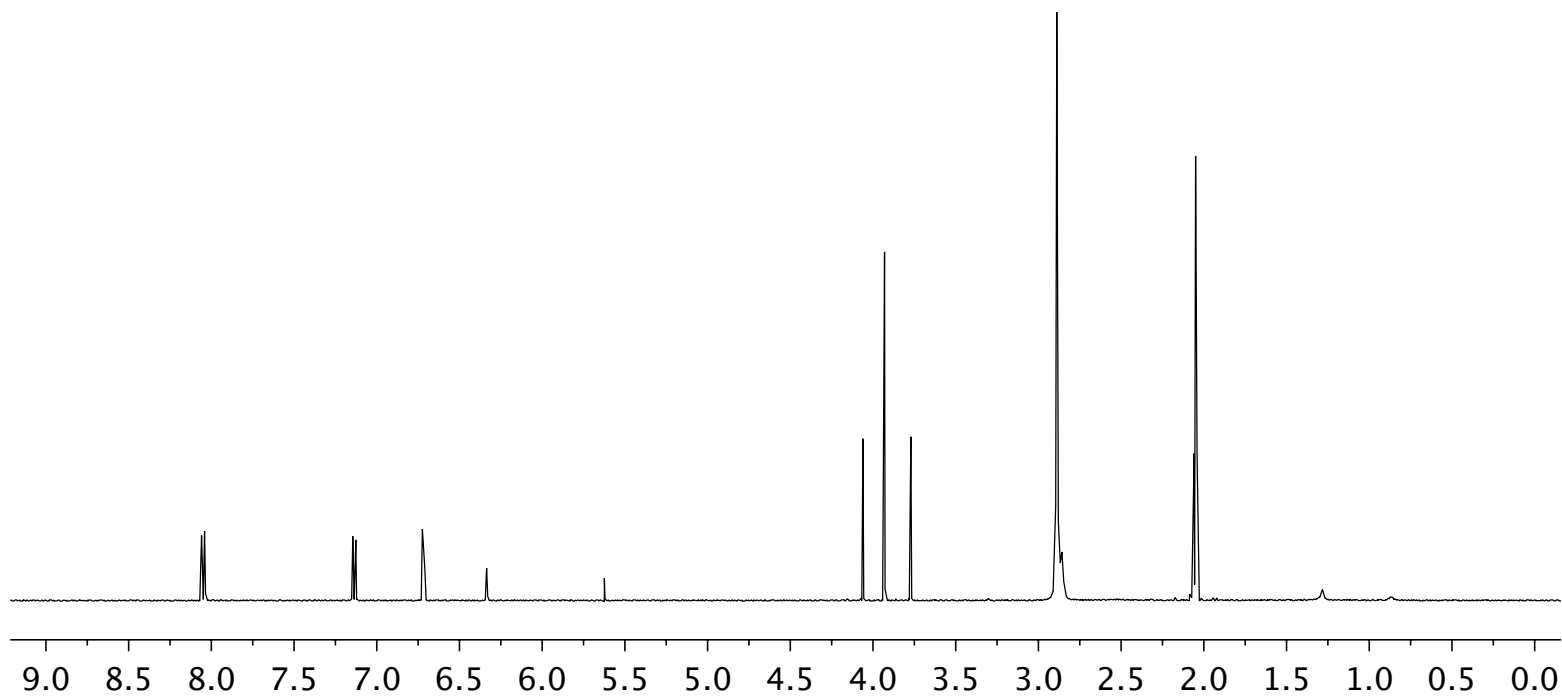

**01** in  $d_6$ -acetone

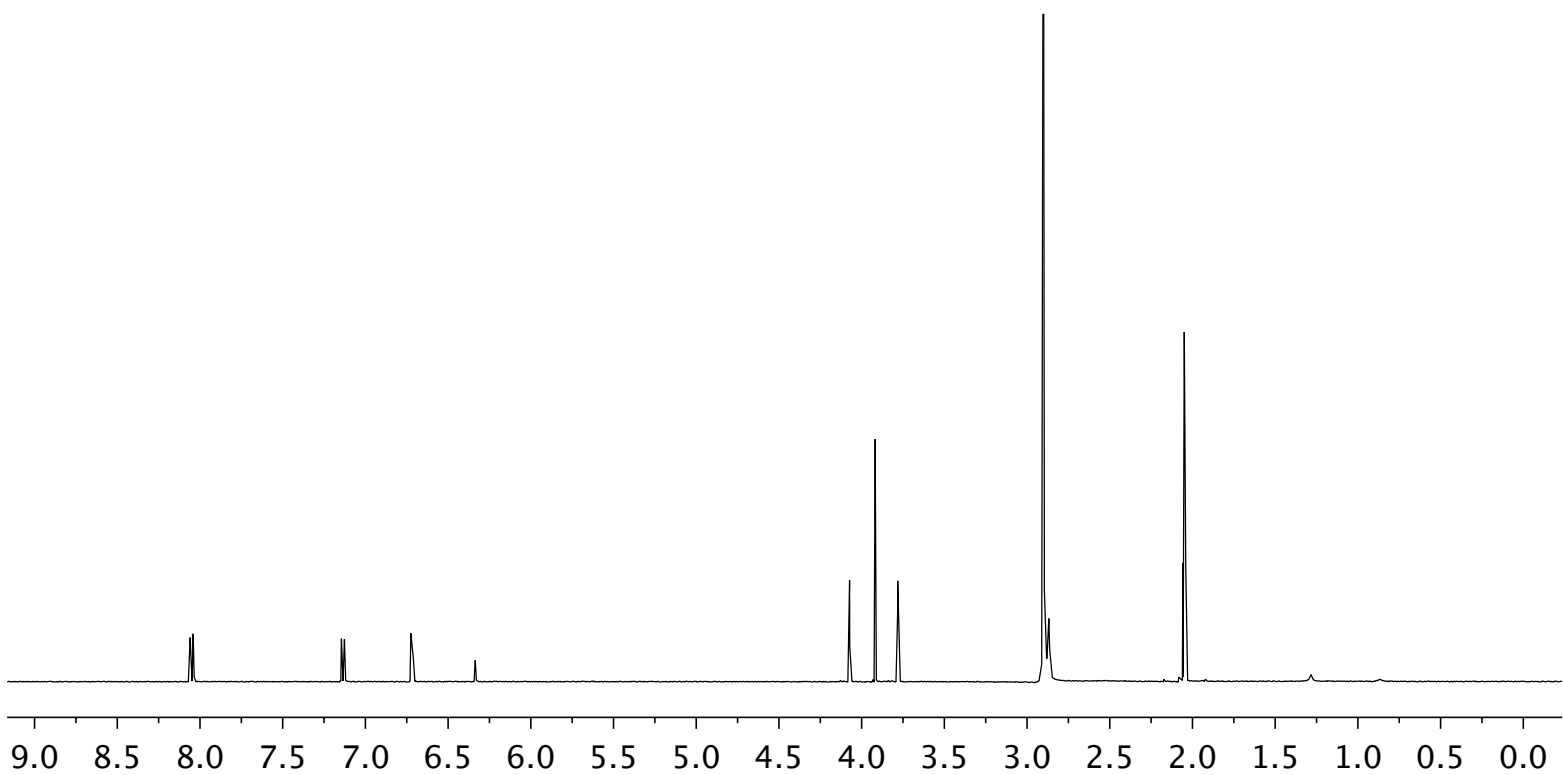

Supplement: c8cc00080h1.pdf [file c8cc00080h1.pdf]
